# Supplementary material for: Alizarin red S–TiO2-catalyzed cascade C(sp3)–H to C(sp2)–H bond formation/cyclization reactions toward tetrahydroquinoline derivatives under visible light irradiation
Source: Royal Society of Chemistry journal article supplement (doi:10.1039/c8nj00476e), 2018-01-01
Supplement: c8nj00476e1.pdf [file c8nj00476e1.pdf]

## Supporting information

### **Alizarin Red S-TiO<sub>2</sub>-catalyzed cascade C(sp<sup>3</sup>)H to C(sp<sup>2</sup>)H bond formation/cyclization reactions toward tetrahydroquinoline derivatives under visible light irradiation**

Mona Hosseini-Sarvari<sup>\*,†</sup>, Mehdi Koohgard<sup>†</sup>, Somayeh Firoozi<sup>†</sup>, Afshan Mohajeri<sup>†</sup>, Hosein Tavakolian<sup>†</sup>

<sup>†</sup> Department of Chemistry, Shiraz University, Shiraz 7194684795, I.R. Iran

### **Contents**

|                                                                              |     |
|------------------------------------------------------------------------------|-----|
| 1. Experimental information                                                  | S2  |
| 2. Characterization of compounds                                             | S4  |
| 3. Indication of H <sub>2</sub> O <sub>2</sub> after completing the reaction | S8  |
| 4. Reaction chamber                                                          | S9  |
| 5. Computational Details                                                     | S9  |
| 6. Characterization of photocatalyst after reusability test                  | S10 |
| 7. <sup>1</sup> H and <sup>13</sup> C NMR Spectra of Products                | S11 |
| 8. References                                                                | S30 |

## 1. Experimental information

**1.1 General Methods.** TiO<sub>2</sub> (P25, specific surface area: 50 m<sup>2</sup>g<sup>-1</sup>) was purchased from Degussa company. Other starting materials were obtained from Sigma-Aldrich and Merck companies and used without further purification. UV-vis diffuse reflectance spectrum was performed with a Shimadzu UV-2450 spectrophotometer. All solvents were dried according to standard procedures. Melting points were measured on a Buchi 510 apparatus in open capillary tubes and the values are uncorrected. Elemental analysis was performed on a 2400 series PerkinElmer analyzer. <sup>1</sup>H NMR and <sup>13</sup>C NMR spectra were obtained using CDCl<sub>3</sub> as solvent on Bruker Advance DPX FT 250 and Bruker Ultrashield 400 (101 MHz) spectrometry respectively, with TMS as an internal standard. (FT-IR) spectra were obtained by a Shimadzu FT-IR 8300 spectrophotometer. Column chromatography: short columns of SiO<sub>2</sub> 60 (70–230 mesh) in glass columns (1.0–1.5 cm); 10–20 g of SiO<sub>2</sub> per nearly 0.4 gram crude mixture. Thin layer chromatography (TLC): silica gel PolyGram SIL G/UV 254 plates.

## 1.2 Synthesis of maleimides.

*N*-aryl maleimides and *N*-alky maleimides were synthesized respectively, according to the modified previous reported procedures<sup>1, 2</sup>.

### 1.2.1 Synthesis of *N*-aryl maleimides.

5 mmol of maleic anhydride was put into to 50 ml three-necked round-bottom flask and dissolved in 10 ml of diethyl ether upon stirring. The flask was equipped by a dropping funnel and reflux condenser. Then, 5 mmol of the given aniline was dissolved in 3 ml diethyl ether and added to flask through the dropping funnel. The reaction mixture was stirred at room temperature for 1 h. Next, the reaction mixture was cooled to the room temperature, was filtered off and washed with diethyl ether to separate *N*-substituted maleamic acid. Afterward, the dried product added to flask and mixed with anhydrous sodium acetate (0.16 g, 2 mmol) and acetic anhydride (2 ml) then stirred for 1 h at 80 °C. The reaction mixture was cooled to the room temperature and poured into an ice-water mixture. The product washed with 20 ml ice-cold water for 3 times. The dried crude was recrystallized from *n*-hexane or *n*-hexane/acetone to obtain corresponding product.

### 1.2.2 Synthesis of *N*-alkymaleimides.

5 mmol of maleic anhydride was put into to 50 ml three-necked round-bottom flask and dissolved in 10 ml of dichloromethane upon stirring. The flask was kept at 0-5 °C and equipped by a dropping funnel. Then, 5 mmol of the given amine was dissolved in 3 ml dichloromethane and added to flask through the dropping funnel within 20 minutes. The reaction mixture was stirred at room temperature for 1 h. Next, the reaction mixture was cooled to the room temperature, was filtered off and washed with diethyl ether to separate *N*-substituted maleic acid. Afterward, the dried product added to flask and was mixed with triethylamine (0.28 ml, 2 mmol) and acetic anhydride (2ml) in 10 ml acetone. The reaction was refluxed for 2 h. The reaction mixture was cooled to the room temperature and poured into an ice-water mixture. The product washed with 20 ml ice-cold water for 3 times. The dried crude purified using silica gel column chromatography with petroleum ether/ethyl acetate as eluents.

### 1.3 Preparation of dyes-TiO<sub>2</sub> photocatalyst.

At first, the TiO<sub>2</sub> powder was heated at 110 °C in air for 3 h to remove adsorbed water on the surface. Dyes-TiO<sub>2</sub> were prepared by a minor modified reported procedure<sup>3</sup>. Typically, three different molar concentration of ARS dye (0.1 mol/L, 0.2 mol/L and 0.4 mol/L) in ethanol were added to 1g of pre-heated nano TiO<sub>2</sub> P25 and stirred at room temperature in the dark for 12 h. The solid was centrifuged and washed with ethanol five times and dried at 40 °C for 30 h on the vacuum oven and kept in the dark.

### 1.4 General Procedure for synthesis of tetrahydroquinolines.

A mixture of the *N,N*-dimethylanilines (2 mmol), maleimides (1 mmol), and ARS-TiO<sub>2</sub> (0.006g) in CH<sub>3</sub>CN (8 mL) placed in a vial under air atmosphere. Subsequently, the reaction mixture was stirred under irradiation of a 12 W blue LED lamp (distance app. 4.0 cm) for 20 hours at ambient temperature (30 °C). The reaction monitored by TLC and after the completion, the reaction mixture was centrifuged to separate the catalyst. Afterward, the remaining solution was poured into water (15 mL) and extracted two times with EtOAc (15 mL), the combined organic layer was washed with brine (15 mL × 2) and dried over Na<sub>2</sub>SO<sub>4</sub>. The mixture concentrated in vacuo and the

residue was purified on silica gel column chromatography with petroleum ether/ethyl acetate (20:1, 20:3).

## 2. Characterization of compounds

### 2-Isobutyl-5-methyl-3a,4,5,9b-tetrahydro-1*H*-pyrrolo[3,4-*c*]quinoline-1,3(2*H*)-dione (**3a**)

White solid, mp = 82-84 °C. <sup>1</sup>HNMR (250 MHz, CDCl<sub>3</sub>) δ (ppm) 0.68-0.72 (m, 6H), 1.80-1.96 (m, 1H), 2.70 (s, 3H), 2.93 (dd, 1H, *J* = 6.7, 4.5 Hz), 3.22 (d, 2H, *J* = 7.5 Hz), 3.24-3.29 (m, 1H), 3.41 (dd, 1H, *J* = 8.7, 2.5 Hz), 3.88 (d, 1H, *J* = 9.2 Hz), 6.61 (d, 1H, *J* = 8.2 Hz), 6.79 (t, 1H, *J* = 7.5 Hz), 7.11 (t, 1H, *J* = 7.7 Hz), 7.37 (d, 1H, *J* = 7.5 Hz). <sup>13</sup>CNMR (101 MHz, CDCl<sub>3</sub>) δ (ppm) 19.80, 26.89, 39.30, 42.04, 43.59, 46.35, 50.90, 112.37, 119.18, 119.62, 128.50, 130.19, 148.49, 176.99, 178.98. IR (KBr) ν 2954, 1774, 1699, 1595, 1496, 1397, 1203, 1086, 1118, 748 cm<sup>-1</sup>. EA Requires: C 70.56, H 7.40, N 10.29. Found: C 70.61, H 7.37, N 10.32.

### 5-Methyl-3a,4,5,9b-tetrahydro-1*H*-pyrrolo[3,4-*c*]quinoline-1,3(2*H*)-dione (**3b**)

White solid, mp = 78-80 °C (77-79 °C)<sup>4</sup>. <sup>1</sup>HNMR (250 MHz, CDCl<sub>3</sub>) δ (ppm) 2.75 (s, 3H), 2.97 (dd, 1H, *J* = 7.2, 4.2 Hz), 3.36 (dd, 1H, *J* = 6.7, 2.7 Hz), 3.44 (dd, 1H, *J* = 8.7, 2.7 Hz), 3.97 (d, 1H, *J* = 9.2 Hz), 6.69 (d, 1H, *J* = 8.2 Hz), 6.84 (td, 1H, *J* = 7.5, 1.2 Hz), 7.12-7.19 (m, 1H), 7.37 (d, 1H, *J* = 7.2 Hz), 8.37 (s, 1H). <sup>13</sup>CNMR (101 MHz, CDCl<sub>3</sub>) δ (ppm) 39.42, 43.26, 44.81, 50.41, 112.58, 118.41, 128.73, 130.12, 148.52, 176.99, 179.01. IR (KBr) ν 3019, 2862, 1766, 1705, 1595, 1496, 1350, 1319, 1119, 794, 748 cm<sup>-1</sup>.

### 2-Cyclohexyl-5-methyl-3a,4,5,9b-tetrahydro-1*H*-pyrrolo[3,4-*c*]quinoline-1,3(2*H*)-dione (**3c**)

Yellowish oil. <sup>1</sup>HNMR (250 MHz, CDCl<sub>3</sub>) δ (ppm) 1.11-1.22 (m, 2H), 1.45-1.73 (m, 8H), 2.71 (s, 3H), 2.94 (dd, 1H, *J* = 6.7, 4.7 Hz), 3.16-3.24 (m, 1H), 3.37 (dd, 1H, *J* = 8.5, 3.0 Hz), 3.79-3.92 (m, 2H), 6.61 (d, 1H, *J* = 8.2 Hz), 6.72-6.82 (m, 1H), 7.11 (t, 1H, *J* = 7.00 Hz), 7.38 (d, 1H, *J* = 7.2 Hz). <sup>13</sup>CNMR (101 MHz, CDCl<sub>3</sub>) δ (ppm) 25.06, 25.82, 28.86, 39.43, 41.73, 43.07, 50.84, 58.76, 112.39, 119.49, 128.43, 129.35, 130.20, 148.41, 176.87, 178.76. IR (KBr) ν 2931, 1705, 1635, 1458, 1373, 1272, 1126, 1072, 748 cm<sup>-1</sup>. EA Requires: C 72.46, H 7.43, N 9.39. Found: C 72.49, H 7.49, N 9.33.

### 2-Benzyl-5-methyl-3a,4,5,9b-tetrahydro-1*H*-pyrrolo[3,4-*c*]quinoline-1,3(2*H*)-dione (**3d**)

White solid, mp = 124 -126 °C (126-128 °C)<sup>4</sup>. <sup>1</sup>HNMR (250 MHz, CDCl<sub>3</sub>) δ (ppm) 2.69 (s, 3H), 2.93 (dd, 1H, *J* = 7.2, 4.5 Hz), 3.20-3.26 (m, 1H), 3.38 (dd, 1H, *J* = 8.75, 2.75 Hz), 3.86 (1H, d, *J* = 9.2 Hz), 4.46-4.60 (m, 2H), 6.62 (d, 1H, *J* = 8.0 Hz), 6.79 (td, 1H, *J* = 7.2, 1.0 Hz), 7.07-7.22 (m, 6H), 7.36 (d, 1H, *J* = 7.5 Hz). <sup>13</sup>CNMR (101 MHz, CDCl<sub>3</sub>) δ (ppm) 39.38, 42.12, 42.81, 43.69, 50.79, 112.50, 118.91, 119.72, 127.84, 128.38, 128.52, 128.64, 130.27, 135.63, 148.52, 176.46, 178.43. IR (KBr) ν 2954, 2862, 1774, 1704, 1596, 1497, 1394, 1342, 1164, 756, 702 cm<sup>-1</sup>.

### 5-Methyl-2-phenyl-3a,4,5,9b-tetrahydro-1*H*-pyrrolo[3,4-*c*]quinoline-1,3(2*H*)-dione (**3e**)

White solid, mp = 201-203 °C (202-204 °C)<sup>5</sup>. <sup>1</sup>H-NMR (250 MHz, 298K, CDCl<sub>3</sub>) δ(ppm); 2.84 (s, 3H), 3.12 (dd, J = 7.2, 4.2 Hz, 1H), 3.51-3.64 (m, 2H), 4.16 (d, 1H, J = 9.5), 6.74 (d, 1H, J = 8.2 Hz), 6.90 (t, 2H, J = 7.5 Hz), 7.20-7.54 (m, 7H). <sup>13</sup>C-NMR (101 MHz, 298K, CDCl<sub>3</sub>), δ(ppm); 39.4, 42.1, 43.5, 50.6, 112.5, 118.5, 119.6, 126.3, 128.4, 128.6, 128.9, 130.3, 131.9, 148.5, 175.7, 177.7. IR (KBr) ν 2923, 1788, 1712, 1592, 1496, 1388, 1326, 1118, 756, 690 cm<sup>-1</sup>.

2-(3-Bromophenyl)-5-methyl-3a,4,5,9b-tetrahydro-1*H*-pyrrolo[3,4-*c*]quinoline-1,3(2*H*)-dione (**3f**)

White solid, mp = 163-165 °C (164-166 °C)<sup>6</sup>. <sup>1</sup>H-NMR (250 MHz, 298K, CDCl<sub>3</sub>) δ(ppm); 2.83 (s, 3H), 3.11 (dd, 1H, J = 11.2, 4.2 Hz), 3.49-3.63 (m, 2H), 4.15 (d, 1H, J = 9.7), 6.75 (d, 1H, J = 7.7 Hz), 6.91 (t, 1H, J = 7.5 Hz), 7.21-7.32 (m, 3H), 7.46-7.52 (m, 3H). <sup>13</sup>C-NMR (101 MHz, 298K, CDCl<sub>3</sub>), δ(ppm); 39.5, 42.1, 43.6, 50.6, 112.7, 118.3, 119.8, 122.3, 125.0, 128.8, 129.4, 130.2, 130.3, 131.6, 133.1, 148.4, 175.4, 177.3. IR (KBr) ν 2854, 1772, 1711, 1595, 1489, 1381, 1195, 786, 754 cm<sup>-1</sup>.

2-(3-Chlorophenyl)-5-methyl-3a,4,5,9b-tetrahydro-1*H*-pyrrolo[3,4-*c*]quinoline-1,3(2*H*)-dione (**3g**)

Whitesolid, mp = 158-160 °C. <sup>1</sup>H-NMR (250 MHz, 298K, CDCl<sub>3</sub>) δ(ppm); 2.86 (s, 3H), 3.17 (dd, 1H, J = 11.2, 4.0 Hz), 3.54-3.66 (m, 2H), 4.19 (d, 1H, J = 9.2 Hz), 6.82 (d, 1H, J = 8.0 Hz), 6.96 (td, 1H, J = 7.5, 1.0 Hz), 7.18-7.40 (m, 5H), 7.55 (d, 1H, J = 7.5 Hz). <sup>13</sup>C-NMR (101 MHz, 298K, CDCl<sub>3</sub>), δ(ppm); 39.5, 42.2, 43.7, 50.6, 112.7, 118.3, 119.8, 124.6, 126.6, 128.7, 128.8, 130.0, 130.3, 133.0, 134.5, 148.5, 175.4, 177.4. IR (KBr) ν 2844, 1774, 1712, 1596, 1481, 1388, 1195, 786, 748 cm<sup>-1</sup>. EA Requires: C 66.16, H 4.63, N 8.57. Found: C 66.11, H 4.25, N 8.53.

2-(4-Chlorophenyl)-5-methyl-3a,4,5,9b-tetrahydro-1*H*-pyrrolo[3,4-*c*]quinoline-1,3(2*H*)-dione (**3h**)

White solid, mp = 187-189 °C (188-190 °C)<sup>7</sup>. <sup>1</sup>H-NMR (250 MHz, CDCl<sub>3</sub>) δ(ppm) 2.83 (s, 3H), 3.10 (dt, 1H, J = 11.5, 4.2 Hz), 3.49-3.63 (m, 2H), 4.15 (d, 1H, J = 9.5 Hz), 6.76 (dd, 1H, J = 8.2, 3.0 Hz), 6.88-6.95 (m, 1H), 7.21-7.27 (m, 3H), 7.36-7.41 (m, 2H), 7.51 (dd, 1H, J = 7.7, 2.2 Hz). <sup>13</sup>C-NMR (101 MHz, CDCl<sub>3</sub>) δ(ppm) 39.51, 42.12, 43.59, 50.62, 112.66, 118.40, 119.78, 127.59, 128.79, 129.18, 130.30, 130.44, 134.22, 148.47, 175.53, 177.46. IR (KBr) ν 2958, 1782, 1712, 1595, 1488, 1396, 1326, 1203, 756 cm<sup>-1</sup>.

2-(4-Methoxyphenyl)-5-methyl-3a,4,5,9b-tetrahydro-1*H*-pyrrolo[3,4-*c*]quinoline-1,3(2*H*)-dione (**3i**)

White solid, mp = 221-223 °C (222-224 °C)<sup>7</sup>. <sup>1</sup>H-NMR (250 MHz, 298K, CDCl<sub>3</sub>) δ(ppm); 2.84 (s, 3H), 3.15 (dd, 1H, J = 11.2, 4.2 Hz), 3.50-3.64 (m, 2H), 3.80 (s, 3H), 4.16 (d, 1H, J = 9.2 Hz), 6.78 (d, J = 8.2 Hz, 1H), 6.89-7.01 (m, 3H), 7.14-7.28 (m, 3H), 7.55 (d, 1H, J = 7.5 Hz). <sup>13</sup>C-NMR (101 MHz, 298K, CDCl<sub>3</sub>), δ(ppm); 39.5, 42.1, 43.5, 50.7, 55.5, 112.5, 114.3, 118.6, 119.7, 124.6, 127.6, 128.7, 130.4, 148.5, 159.4, 176.0, 178.0. IR (KBr) ν 2931, 1713, 1594, 1512, 1398, 1249, 1164, 763 cm<sup>-1</sup>.

2-(4-Ethoxyphenyl)-5-methyl-3a,4,5,9b-tetrahydro-1*H*-pyrrolo[3,4-*c*]quinoline-1,3(2*H*)-dione (**3j**)

White solid, mp = 151-153 °C. <sup>1</sup>H-NMR (250 MHz, 298K, CDCl<sub>3</sub>) δ(ppm); 1.41 (t, 3H, J = 7.0 Hz), 2.85 (s, 3H), 3.13 (dd, 1H, J = 11.2, 4.5 Hz), 3.49-3.64 (m, 2H), 4.04 (q, 2H, J = 7.0 Hz), 4.15 (d, 1H, J = 9.5), 6.76 (d, 1H, J = 8.0 Hz), 6.89-6.94 (m, 3H), 7.15-7.28 (m, 3H), 7.55 (d, 1H, J = 7.5 Hz). <sup>13</sup>C-NMR (101 MHz, 298K, CDCl<sub>3</sub>) δ(ppm); 14.8, 39.5, 42.1, 43.5, 50.7, 63.7, 112.5, 114.8, 118.7, 119.7, 124.5, 127.6, 128.7, 130.4, 148.5, 158.8, 176.1, 178.0. IR (KBr) ν 2933, 1774, 1711, 1596, 1511, 1396, 1248, 1203, 1166, 810, 752 cm<sup>-1</sup>. EA Requires: C 71.41, H 5.99, N 8.33. Found: C 71.45, H 5.94, N 8.29.

2-(4-Isopropylphenyl)-5-methyl-3a,4,5,9b-tetrahydro-1*H*-pyrrolo[3,4-*c*]quinoline-1,3(2*H*)-dione (**3k**)

White solid, mp = 157-159 °C. <sup>1</sup>H-NMR (250 MHz, 298K, CDCl<sub>3</sub>) δ(ppm); 1.23 (d, J = 7.0 Hz, 6H), 2.82 (s, 3H), 2.86-2.96 (m, 1H), 3.11 (dd, 1H, J = 11.2, 4.2 Hz), 3.48-3.62 (m, 2H), 4.13 (d, 1H, J = 9.5), 6.74 (d, J = 8.2 Hz, 1H), 6.90 (t, 1H, J = 7.5 Hz), 7.15-7.29 (m, 5H), 7.53 (d, 1H, J = 7.7 Hz). <sup>13</sup>C-NMR (101 MHz, 298K, CDCl<sub>3</sub>) δ(ppm); 23.9, 33.9, 39.5, 42.1, 43.5, 50.7, 112.5, 118.7, 119.6, 126.2, 127.1, 128.7, 129.6, 130.4, 148.5, 149.3, 175.9, 177.9. IR (KBr) ν 2962, 2861, 1712, 1595, 1504, 1388, 1272, 1195, 748 cm<sup>-1</sup>. EA Requires: C 75.42, H 6.63, N 8.38. Found: C 75.45, H 6.68, N 8.42.

2-(2-Ethylphenyl)-5-methyl-3a,4,5,9b-tetrahydro-1*H*-pyrrolo[3,4-*c*]quinoline-1,3(2*H*)-dione (**3l**)

White solid, mp = 128-130 °C. <sup>1</sup>H-NMR (250 MHz, 298K, CDCl<sub>3</sub>) δ(ppm); 0.81 (t, 3H, J = 7.5 Hz), 2.14 (qd, 2H, J = 7.5, 3.2 Hz), 2.86 (s, 3H), 3.12 (dd, 1H, J = 11.2, 3.7 Hz), 3.54-3.67 (m, 2H), 4.19 (d, 1H, J = 9.2 Hz), 6.77 (d, 1H, J = 8.2 Hz), 6.88-6.97 (m, 1H), 7.11 (d, 1H, J = 7.2 Hz), 7.20-7.37 (m, 4H), 7.52 (d, 1H, J = 7.2 Hz). <sup>13</sup>C-NMR (101 MHz, 298K, CDCl<sub>3</sub>) δ(ppm); 14.2, 24.2, 39.2, 42.9, 44.5, 51.0, 112.3, 118.8, 119.8, 126.9, 128.2, 128.4, 128.7, 129.1, 129.7, 130.3, 130.7, 148.6, 176.3, 178.3. IR (KBr) ν 2967, 2823, 1714, 1598, 1512, 1396, 1203, 756 cm<sup>-1</sup>. EA Requires: C 74.98, H 6.29, N 8.74. Found: C 74.95, H 6.32, N 8.79.

2-(5-Methyl-1,3-dioxo-1,3,3a,4,5,9b-hexahydro-2*H*-pyrrolo[3,4-*c*]quinolin-2-yl)benzonitrile (**3m**)

White solid, mp = 177-179 °C. <sup>1</sup>H-NMR (250 MHz, CDCl<sub>3</sub>) δ (ppm) 2.87 (s, 3H), 3.22 (dd, 1H, J = 7.2, 2.2 Hz), 3.61-3.72 (m, 2H), 4.29 (d, 1H, J = 9.2 Hz), 6.82 (1H, d, J = 8.0 Hz), 6.95 (td, 1H, J = 6.2, 1.2 Hz), 7.26 (td, 2H, J = 6.7, 1.5 Hz), 7.48-7.55 (m, 2H), 7.68 (t, 1H, J = 7.7 Hz), 7.77 (d, 1H, J = 7.7 Hz). <sup>13</sup>C-NMR (101 MHz, CDCl<sub>3</sub>) δ (ppm) 39.45, 42.58, 44.07, 50.77, 112.71, 119.79, 119.84, 119.86, 128.93, 129.18, 129.20, 129.53, 130.31, 130.35, 133.58, 133.66, 148.65, 174.85, 176.71. IR (KBr) ν 2854, 2229, 1720, 1504, 1380, 1188, 763 cm<sup>-1</sup>. EA Requires: C 71.91, H 4.76, N 13.24. Found: C 71.94, H 4.73, N 13.28.

2-(4-Bromophenyl)-5-methyl-3a,4,5,9b-tetrahydro-1*H*-pyrrolo[3,4-*c*]quinoline-1,3(2*H*)-dione (**3n**)

White solid, mp = 217-219 °C. <sup>1</sup>H-NMR (250 MHz, CDCl<sub>3</sub>) δ (ppm) 2.76 (s, 3H), 3.04 (dd, 1H, J = 7.2, 4.2 Hz), 3.45-3.56 (m, 2H), 4.08 (d, 1H, J = 9.5 Hz), 6.68 (d, 1H, J = 8.2 Hz), 6.84 (td, 1H, J = 7.5, 1.0 Hz), 7.08-7.20 (m, 3H), 7.42-7.50 (m, 3H). <sup>13</sup>C-NMR (101 MHz, CDCl<sub>3</sub>) δ (ppm) 39.51, 42.18, 43.74, 50.59, 112.78, 118.08, 119.91, 121.57, 123.13, 128.96, 129.78, 130.28, 132.18, 148.51, 175.19, 177.12. IR (KBr) ν 2962, 1780, 1711, 1590, 1488, 1394, 1319, 1203, 756 cm<sup>-1</sup>. EA Requires: C 58.24, H 4.07, N 7.55. Found: C 58.26, H 4.03, N 7.58.

2-(4-Hydroxyphenyl)-5-methyl-3a,4,5,9b-tetrahydro-1*H*-pyrrolo[3,4-*c*]quinoline-1,3(2*H*)-dione (**3o**)

White solid, mp = 146-148 °C. <sup>1</sup>HNMR (250 MHz, CDCl<sub>3</sub>) δ (ppm) 2.76 (s, 3H), 3.05 (dd, 1H, *J* = 7.5, 3.7 Hz), 3.46-3.57 (m, 2H), 4.09 (d, 1H, *J* = 9.2 Hz), 6.68 (d, 1H, *J* = 8.2 Hz), 6.85 (td, 1H, *J* = 7.5, 1.0 Hz), 7.08 (d, 2H, *J* = 8.7 Hz), 7.17-7.20 (m, 1H), 7.24 (d, 2H, *J* = 9.0 Hz), 7.45 (d, 1H, *J* = 7.7 Hz). <sup>13</sup>CNMR (101 MHz, CDCl<sub>3</sub>) δ (ppm) 21.15, 39.47, 42.13, 43.60, 50.66, 112.59, 118.49, 119.73, 122.16, 127.36, 128.76, 129.41, 130.34, 148.54, 150.26, 175.68, 177.60. IR (KBr) ν 3479, 2896, 1766, 1712, 1496, 1373, 1172, 1010, 748 cm<sup>-1</sup>. EA Requires: C 70.12, H 5.23, N 9.09. Found: C 70.09, H 5.19, N 9.13.

5-Methyl-2-(4-nitrophenyl)-3a,4,5,9b-tetrahydro-1*H*-pyrrolo[3,4-*c*]quinoline-1,3(2*H*)-dione (**3p**)

Yellow solid, mp = 138-140 °C. <sup>1</sup>HNMR (250 MHz, CDCl<sub>3</sub>) δ (ppm) 2.85 (s, 3H), 3.16 (dd, 1H, *J* = 7.2, 4.5 Hz), 3.57-3.68 (m, 2H), 4.23 (d, 1H, *J* = 9.5 Hz), 6.78 (d, 1H, *J* = 8.2 Hz), 6.94 (td, 1H, *J* = 7.5, 1.0 Hz), 7.26 (td, 1H, *J* = 7.2, 1.5 Hz), 7.51-7.61 (m, 3H), 8.21-8.29 (dd, 2H, *J* = 9.0, 2.0 Hz). <sup>13</sup>CNMR (101 MHz, CDCl<sub>3</sub>) δ (ppm) 39.49, 42.17, 43.79, 50.58, 112.78, 118.03, 119.93, 124.27, 126.83, 129.02, 130.29, 137.49, 146.88, 148.55, 175.15, 177.07. IR (KBr) ν 2923, 1782, 1713, 1596, 1527, 1342, 1180, 765 cm<sup>-1</sup>. EA Requires: C 64.09, H 4.48, N 12.46. Found: C 64.13, H 4.43, N 12.44.

5-Methyl-2-(3-nitrophenyl)-3a,4,5,9b-tetrahydro-1*H*-pyrrolo[3,4-*c*]quinoline-1,3(2*H*)-dione (**3q**)

Yellow solid, mp = 188-190 °C. <sup>1</sup>HNMR (250 MHz, CDCl<sub>3</sub>) δ (ppm) 2.85 (s, 3H), 3.11-3.17 (m, 1H), 3.57-3.67 (m, 2H), 4.23 (d, 1H, *J* = 9.5 Hz), 6.77 (1H, d, *J* = 8.2 Hz), 6.93 (td, 1H, *J* = 7.5, 1.0 Hz), 7.22-7.29 (m, 1H), 7.52 (d, 1H, *J* = 7.5 Hz), 7.62 (t, 1H, *J* = 8.0 Hz), 7.69-7.74 (m, 1H), 8.21-8.27 (m, 2H). <sup>13</sup>CNMR (101 MHz, CDCl<sub>3</sub>) δ (ppm) 39.52, 42.21, 43.78, 50.61, 112.79, 118.09, 119.92, 121.61, 123.16, 129.00, 129.81, 130.30, 132.22, 133.03, 148.36, 148.58, 175.23, 177.17. IR (KBr) ν 2920, 1712, 1527, 1496, 1388, 1350, 1188, 756 cm<sup>-1</sup>. EA Requires: C 64.09, H 4.48, N 12.46. Found: C 64.12, H 4.51, N 12.43.

8-Bromo-5-methyl-2-phenyl-3a,4,5,9b-tetrahydro-1*H*-pyrrolo[3,4-*c*]quinoline-1,3(2*H*)-dione (**3r**)

White solid, mp = 158-160 °C (157-159 °C)<sup>4</sup>. <sup>1</sup>HNMR (250 MHz, CDCl<sub>3</sub>) δ (ppm) 2.75 (s, 3H), 3.06 (dd, 1H, *J* = 7.5, 3.7 Hz), 3.45-3.56 (m, 2H), 4.03 (d, 1H, *J* = 9.2 Hz), 6.58 (1H, d, *J* = 8.7 Hz), 7.16-7.39 (m, 6H), 7.58 (d, 1H, *J* = 2.2 Hz). <sup>13</sup>CNMR (101 MHz, CDCl<sub>3</sub>) δ (ppm) 39.50, 41.80, 43.31, 50.40, 111.69, 114.29, 120.44, 126.34, 128.68, 129.10, 131.47, 131.85, 132.74, 147.52, 175.18, 177.31. IR (KBr) ν 2923, 1713, 1488, 1396, 1319, 1195, 694, 624 cm<sup>-1</sup>.

5,8-Dimethyl-2-phenyl-3a,4,5,9b-tetrahydro-1*H*-pyrrolo[3,4-*c*]quinoline-1,3(2*H*)-dione (**3t**)

White solid, mp = 193-195 °C (193-195 °C)<sup>5</sup>. <sup>1</sup>HNMR (250 MHz, CDCl<sub>3</sub>) δ (ppm) 2.22 (s, 1H), 2.73 (s, 3H), 2.99 (dd, 1H, *J* = 7.0, 4.2 Hz), 3.44-3.54 (m, 2H), 4.05 (d, 1H, *J* = 9.5 Hz), 6.58 (d, 1H, *J* = 8.2 Hz), 6.97 (dd, 1H, *J* = 6.5, 1.7 Hz), 7.18 (t, 1H, *J* = 1.5 Hz), 7.21 (d, 1H, *J* = 1.5 Hz), 7.27-7.39 (m, 4H). <sup>13</sup>CNMR (101 MHz, CDCl<sub>3</sub>) δ (ppm) 20.46, 39.59, 42.19, 43.59,

50.95, 112.55, 118.52, 126.40, 128.52, 128.82, 129.00, 129.25, 130.83, 130.92, 146.38, 175.92, 177.87. IR (KBr)  $\nu$  2932, 1712, 1505, 1388, 1272, 1195, 690, 619  $\text{cm}^{-1}$ .

### 3. Indication of $\text{H}_2\text{O}_2$ after completing the reaction.

$\text{H}_2\text{O}_2$  test at the end of reaction (*Reaction conditions*: A mixture of 1 (2 mmol), 2 (1 mmol) and ARS- $\text{TiO}_2$  (0.006g) as photocatalyst, in the  $\text{CH}_3\text{CN}$  (8 mL) was irradiated with a 12 W blue LED in the air for 20 h at ambient temperature).

|                                                                                   |                                                                                   |                                                                                   |                                                                                   |                                                                                     |                                                                                     |
|-----------------------------------------------------------------------------------|-----------------------------------------------------------------------------------|-----------------------------------------------------------------------------------|-----------------------------------------------------------------------------------|-------------------------------------------------------------------------------------|-------------------------------------------------------------------------------------|
|  |  |  |  |  |  |
| 1                                                                                 | 2                                                                                 | 3                                                                                 | 4                                                                                 | 5                                                                                   | 6                                                                                   |
| $\text{H}_2\text{O}_2$ Indicator (KI/starch)                                      | Reaction mixture at $t = 0$ h                                                     | Reaction mixture at $t = 24$ h                                                    | Addition of 1 to 3                                                                | Addition of 1 to 30% $\text{H}_2\text{O}_2$                                         | Addition of 1 to 2                                                                  |

**Figure S1.**

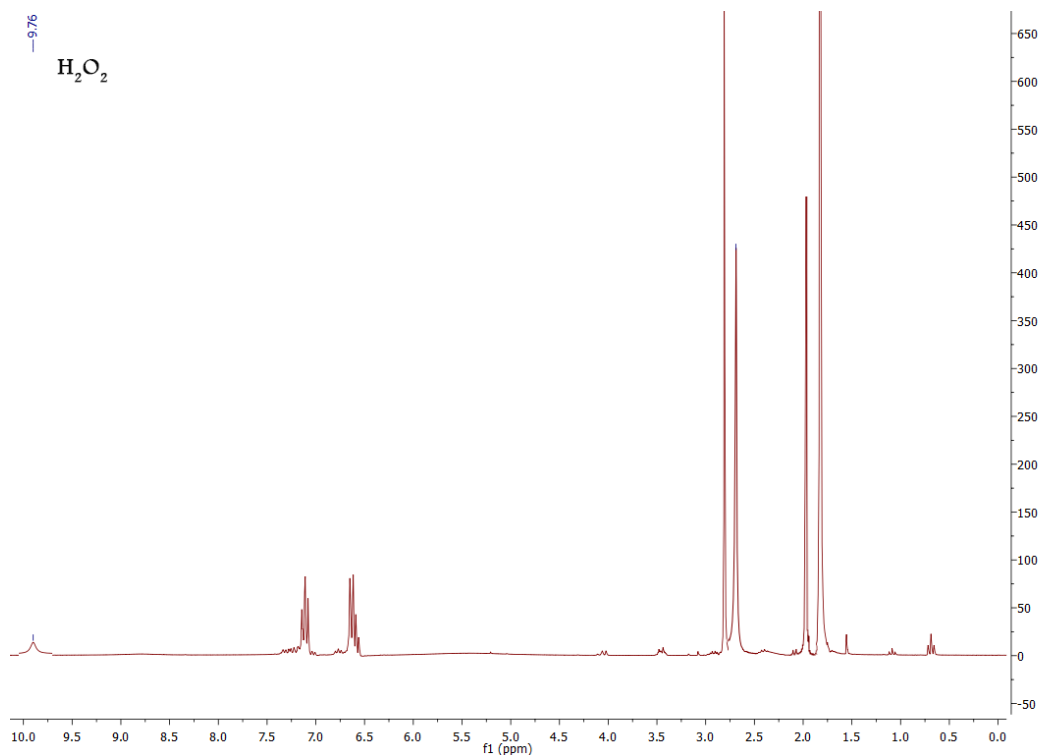

**Figure S2.**



#### 4. The box used for the reactions

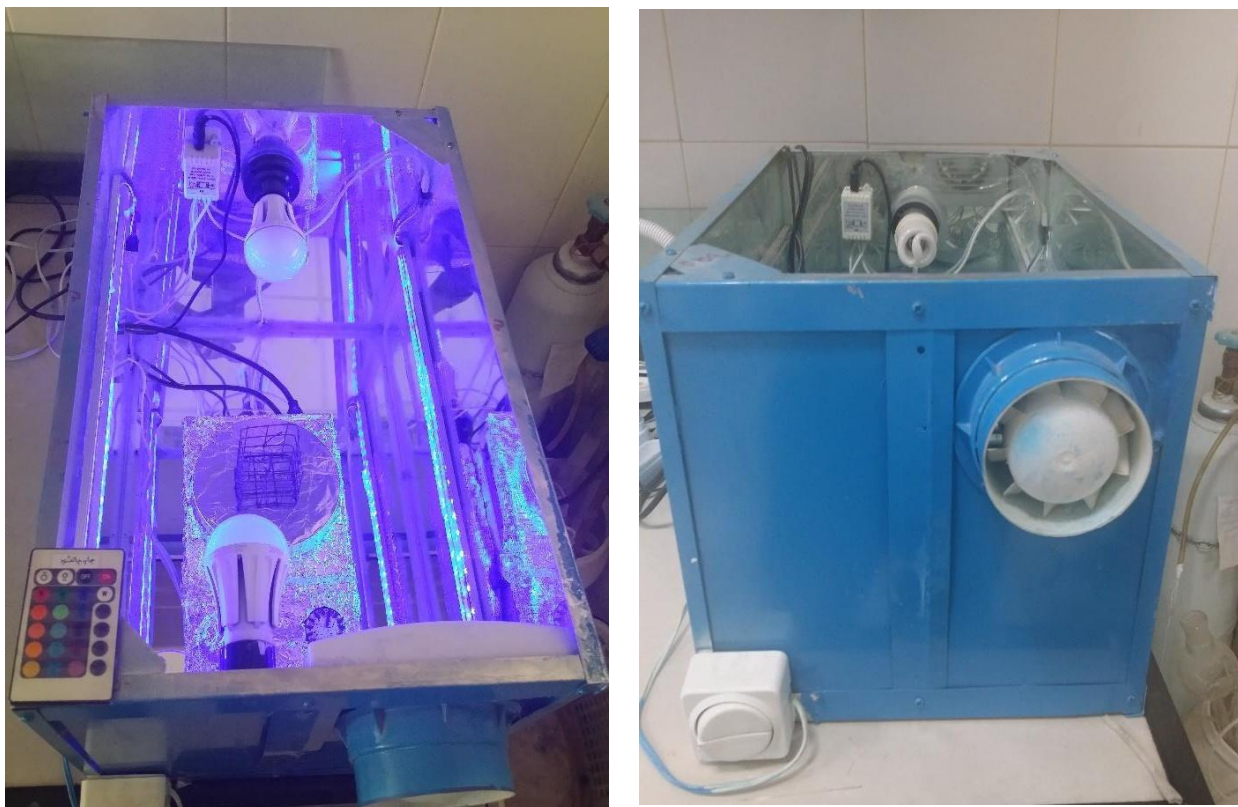

**Figure S3.**

#### 5. Computational Details

The geometry optimizations were performed by density functional theory (DFT) calculations using the B3LYP functional and 6-31G(d,p) basis set. The default parameters for the convergence criteria were used. Subsequent frequency calculations were performed at the same level to verify the optimized structures as the minima. To obtain accurate electrochemical properties, the Gibbs free energies were computed at the G3(MP2) level of theory which has been designed particularly for the prediction of reliable thermochemical properties. The solvation model based on density (SMD) was employed to account for the solvent contribution. The Gibbs free energies of the 1-electron reduction and oxidation half-reactions were calculated in the presence of acetonitrile as solvent. The oxidation and reduction potentials were computed at 298 K and relative to NHE. The Gaussian 09 package<sup>8</sup> was used in all calculations. Vibrational analyses on the optimized structures were performed to confirm the structure.

## 6.Characterization of photocatalyst after reusability test

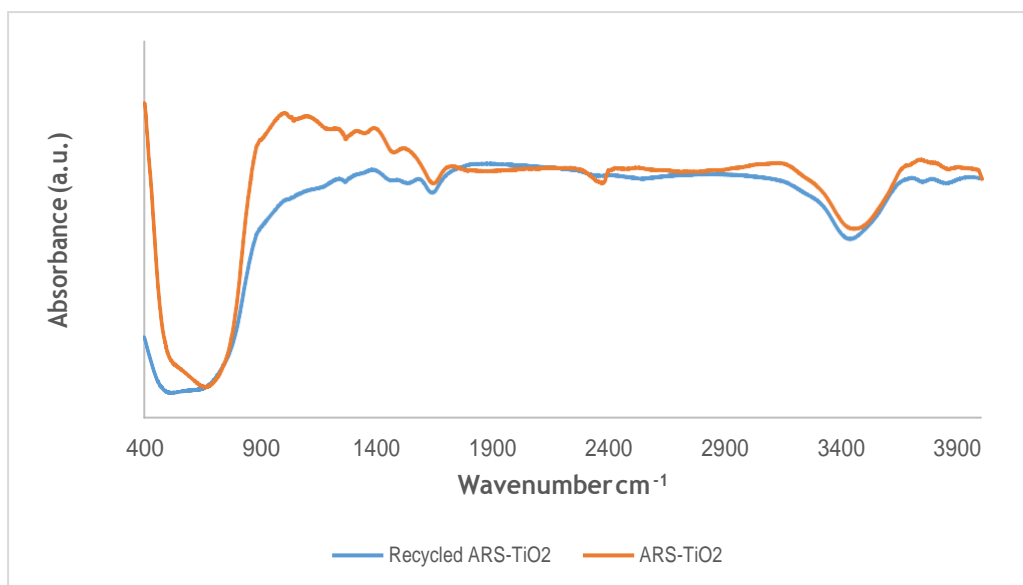

**Figure S4** FT-IR spectra of ARS-TiO<sub>2</sub> before and after recycling

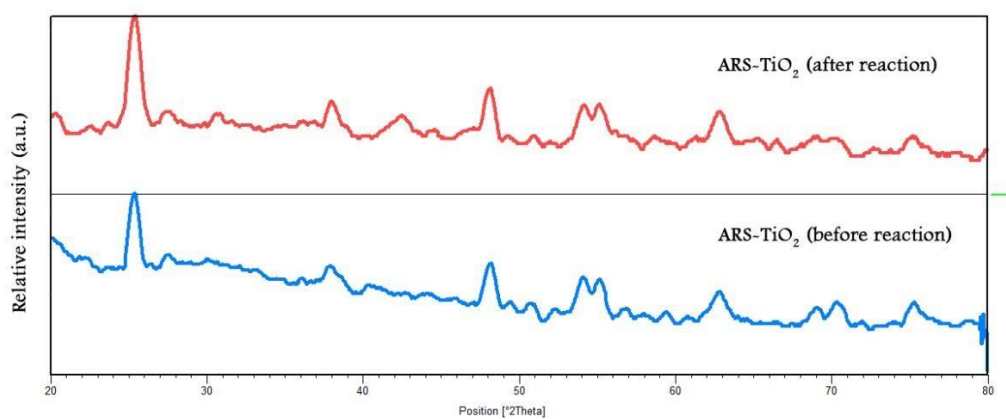

**Figure S5** XRD spectra of ARS-TiO<sub>2</sub> before and after recycling

## 7. $^1\text{H}$ and $^{13}\text{C}$ NMR Spectra of Products

### 3a $^1\text{H}$ NMR

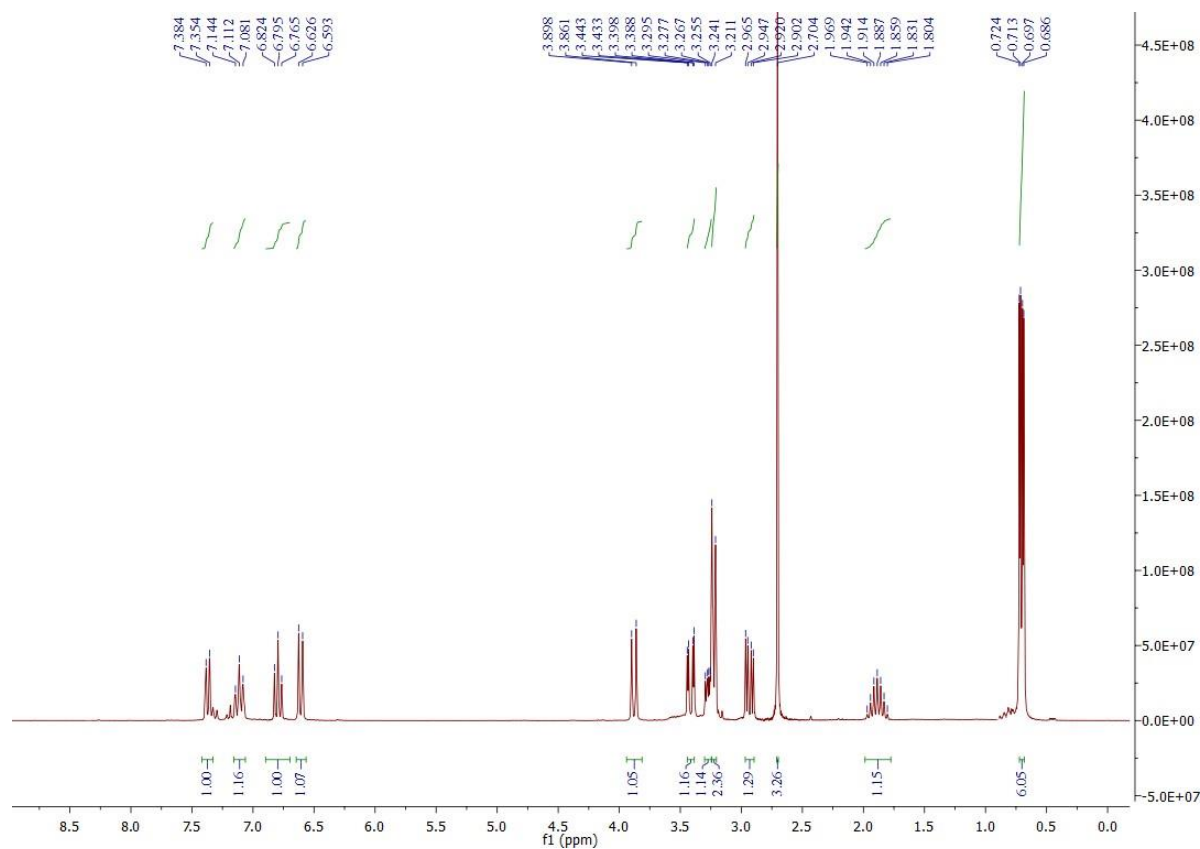

### 3a $^{13}\text{C}$ NMR

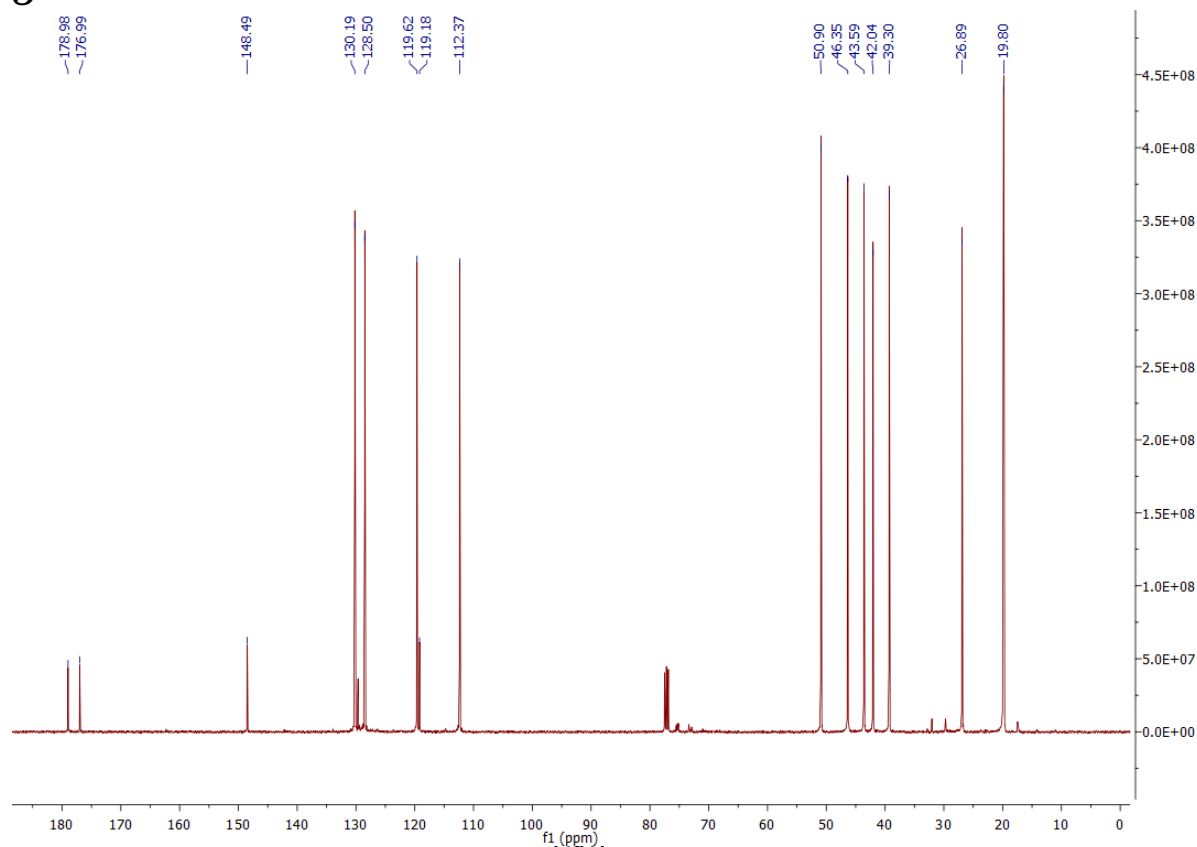

### 3b $^1\text{H}$ NMR

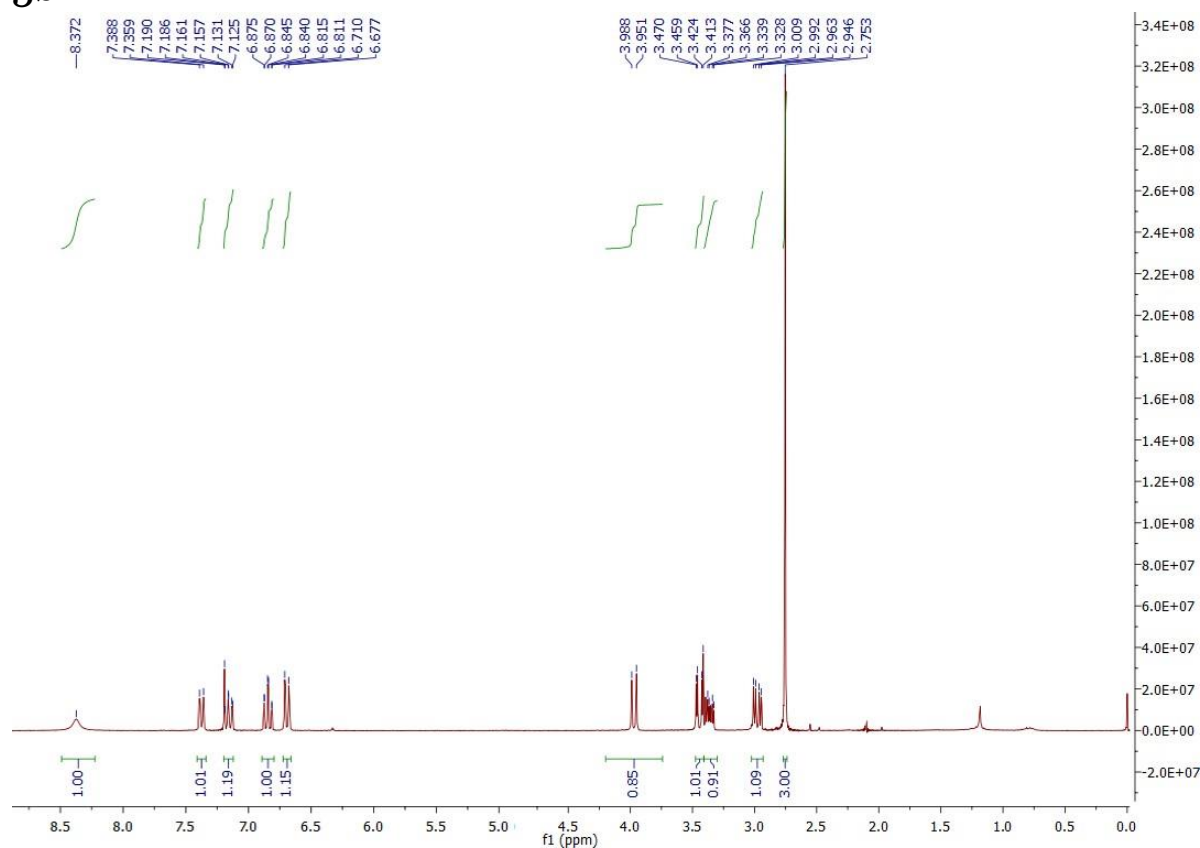

### 3b $^{13}\text{C}$ NMR

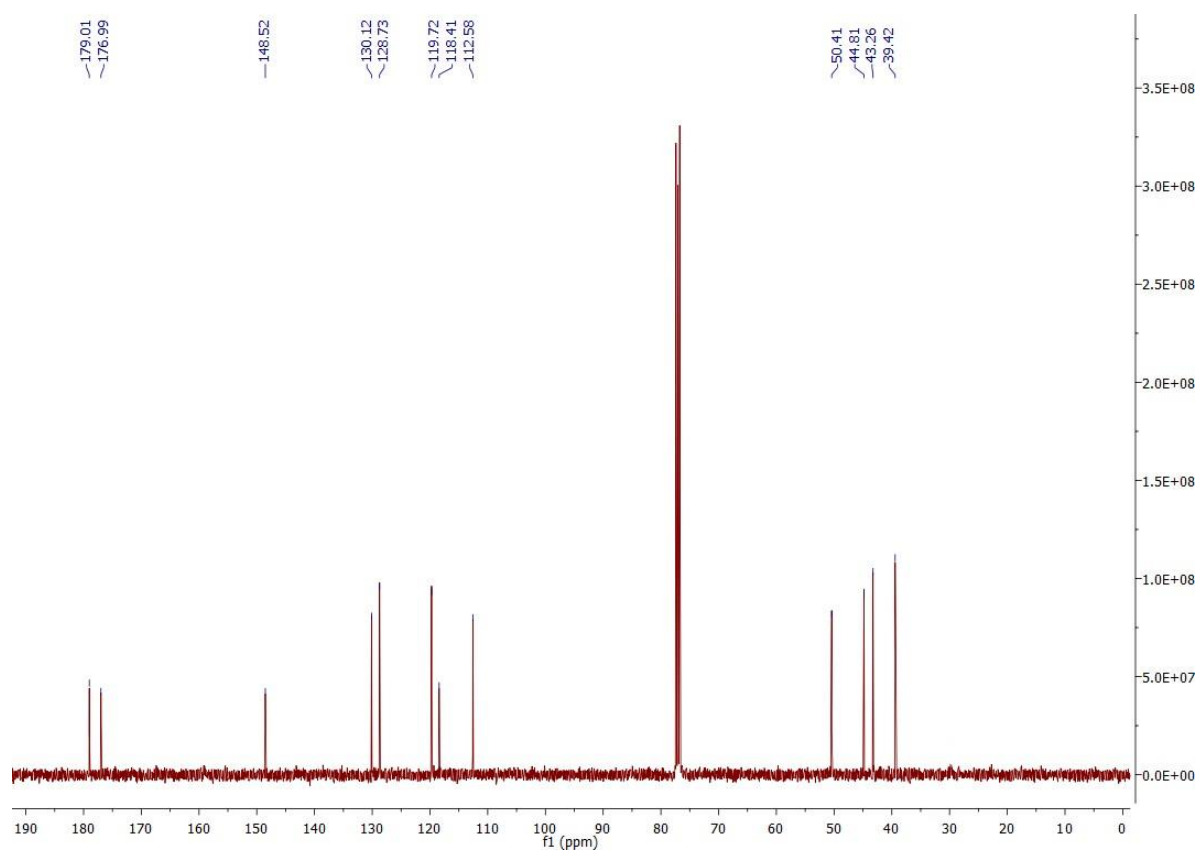

# $3c$ $^1\text{H}$ NMR

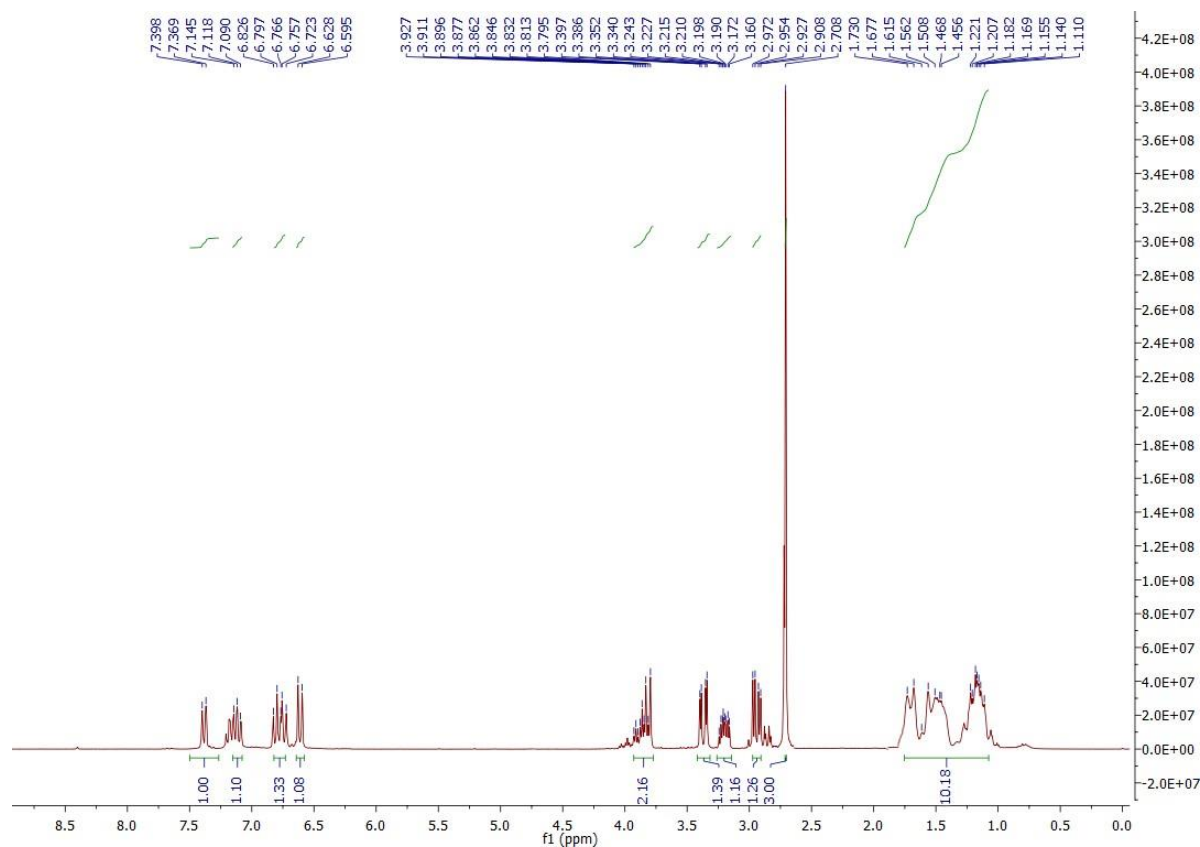

# $3c$ $^{13}\text{C}$ NMR

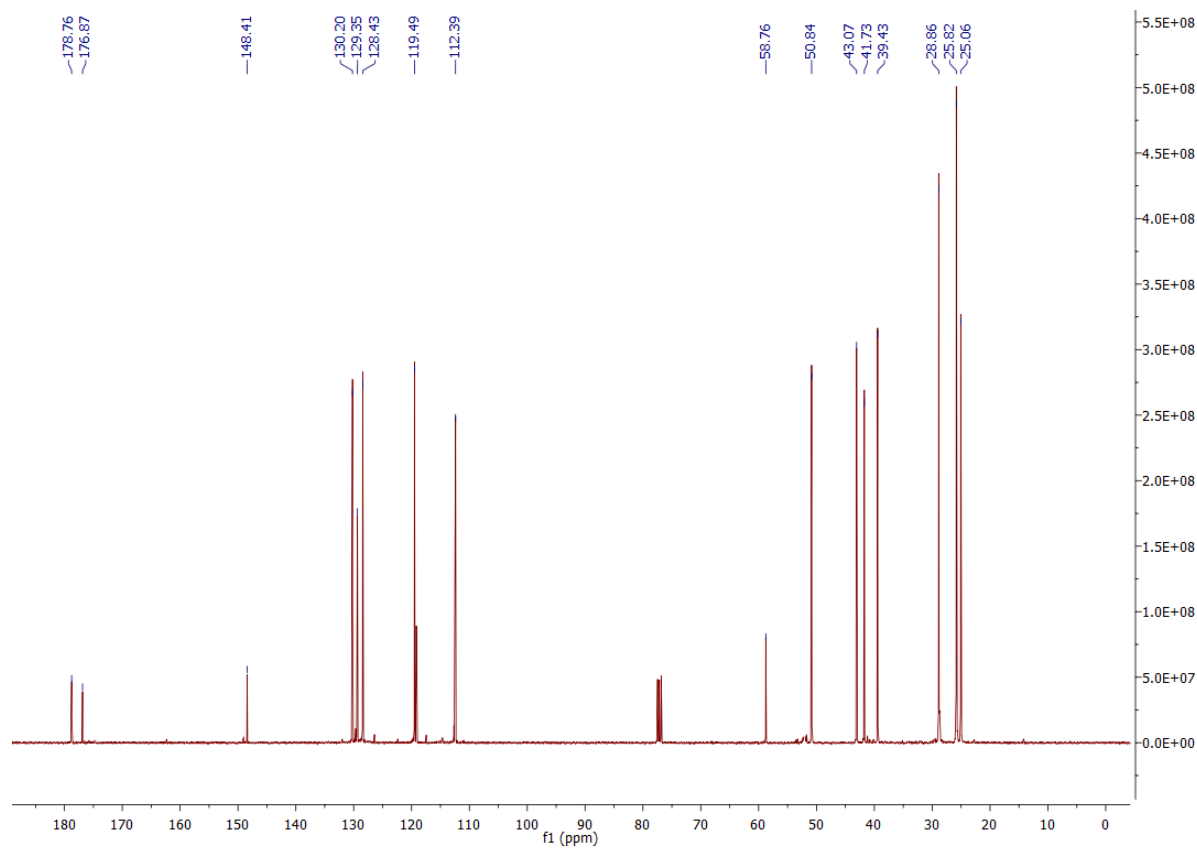

### 3d $^1\text{H}$ NMR

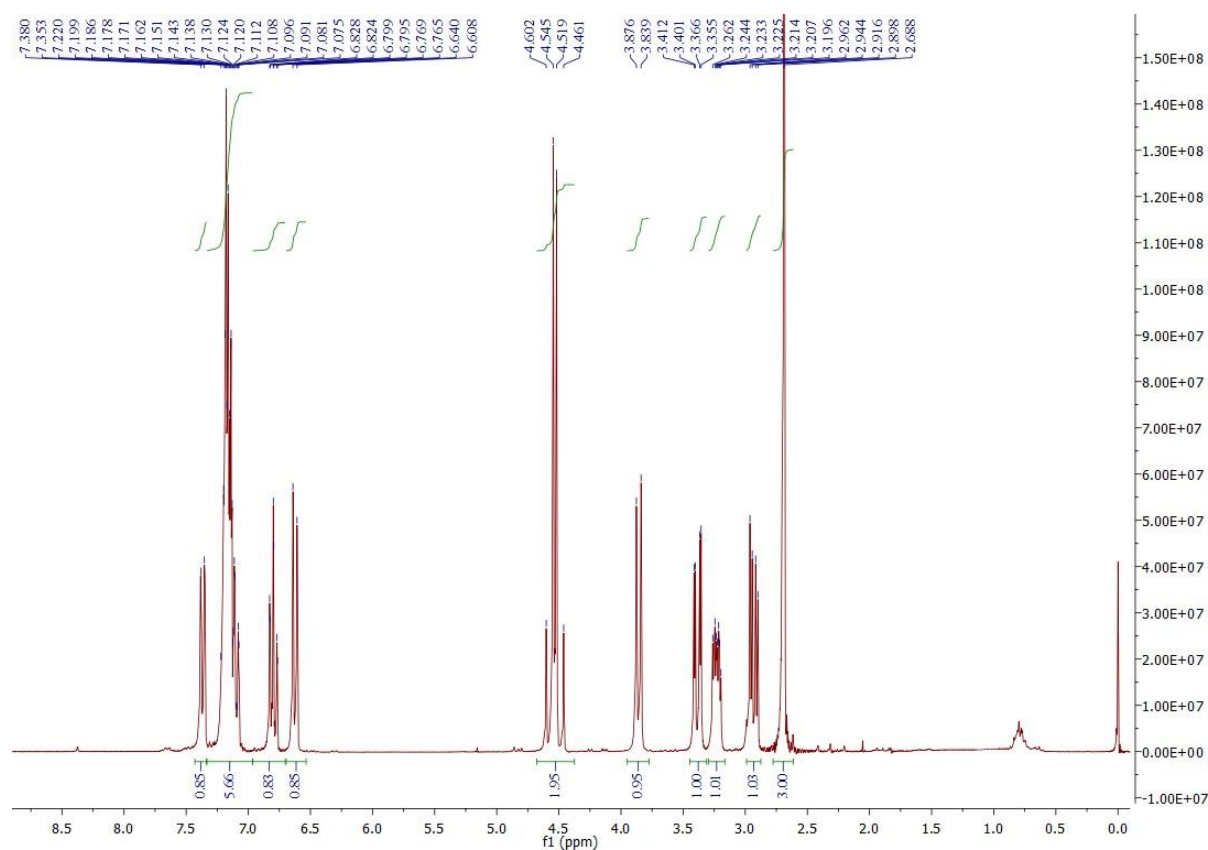

### 3d $^{13}\text{C}$ NMR

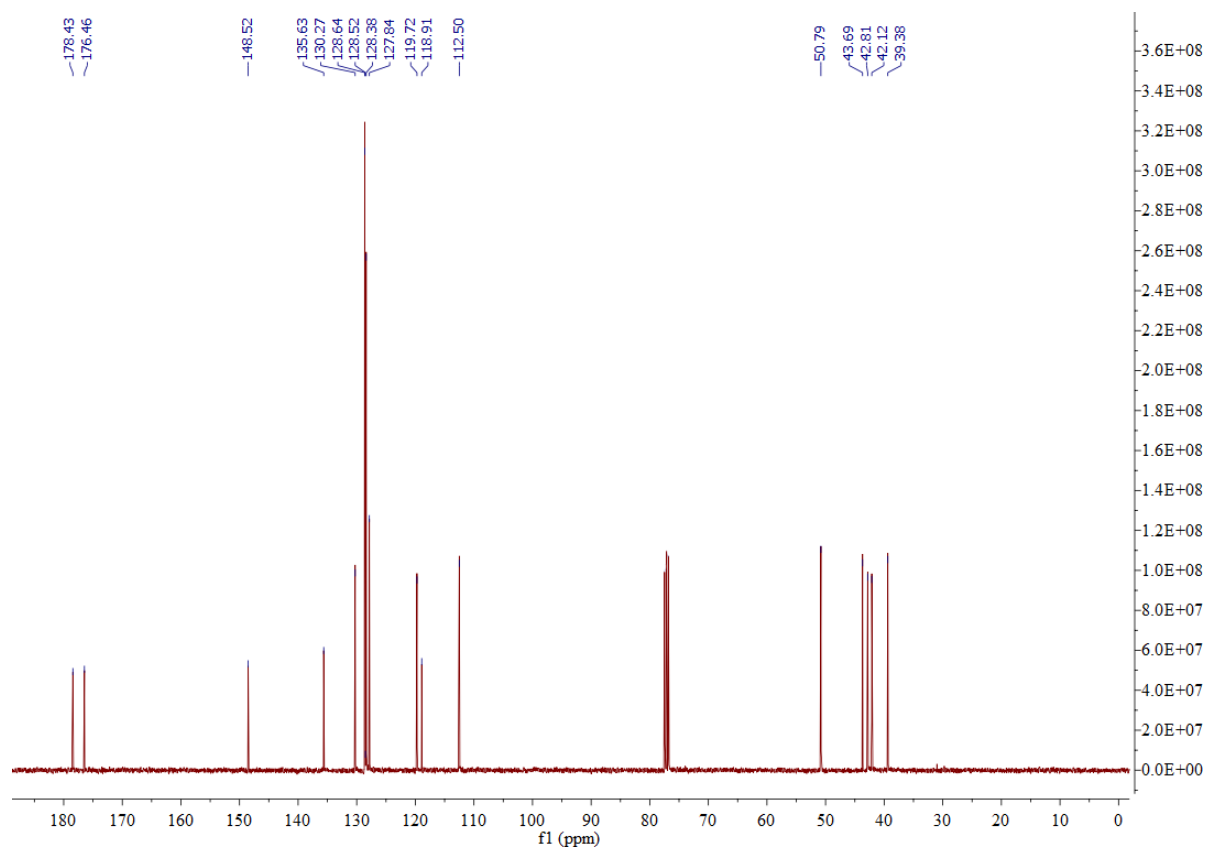

# $3e$ $^1\text{H}$ NMR

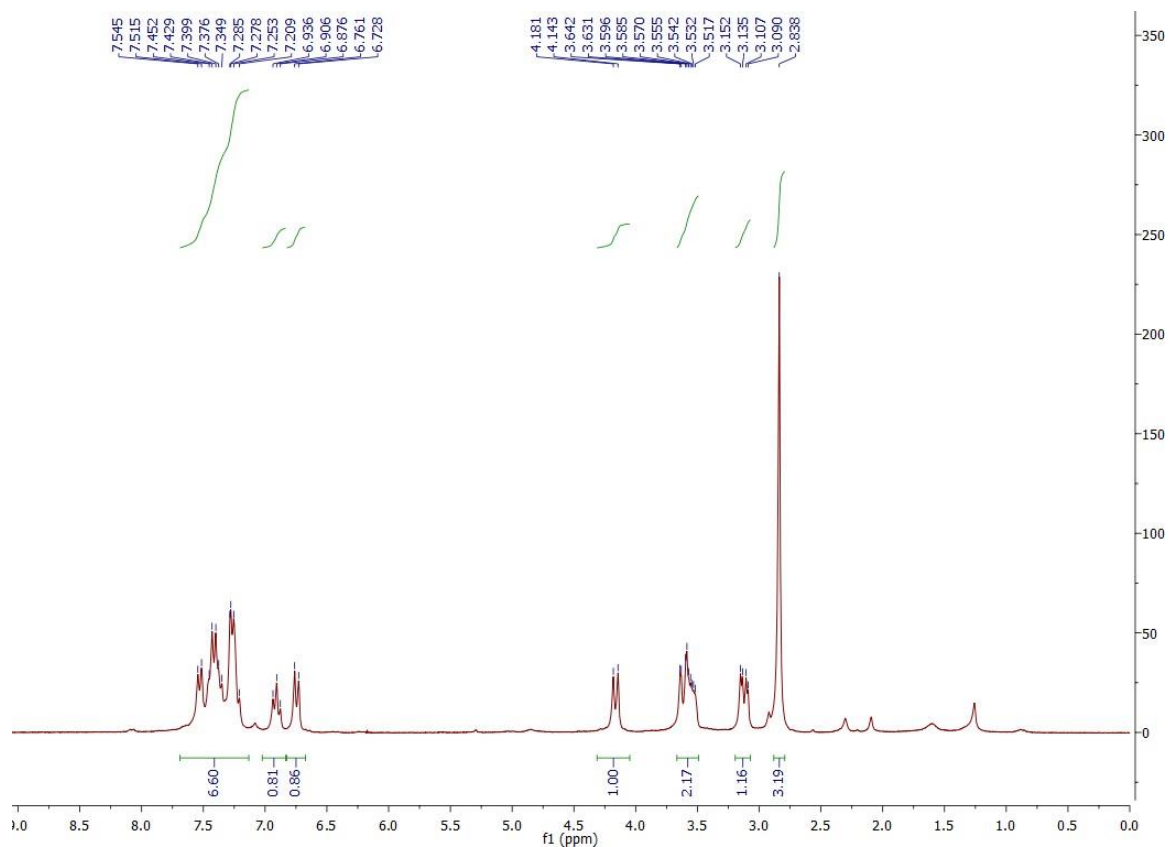

# $3e$ $^{13}\text{C}$ NMR

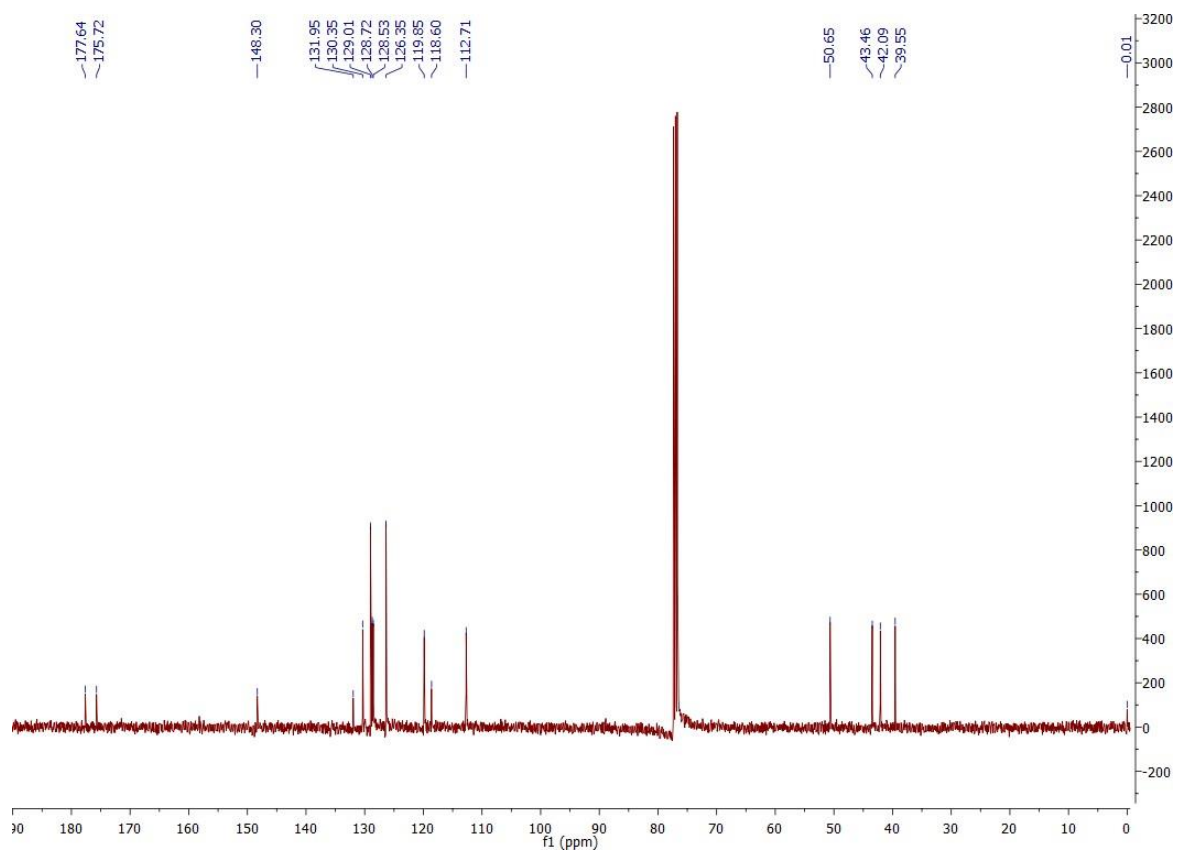



# $^3\text{f}^1\text{H NMR}$

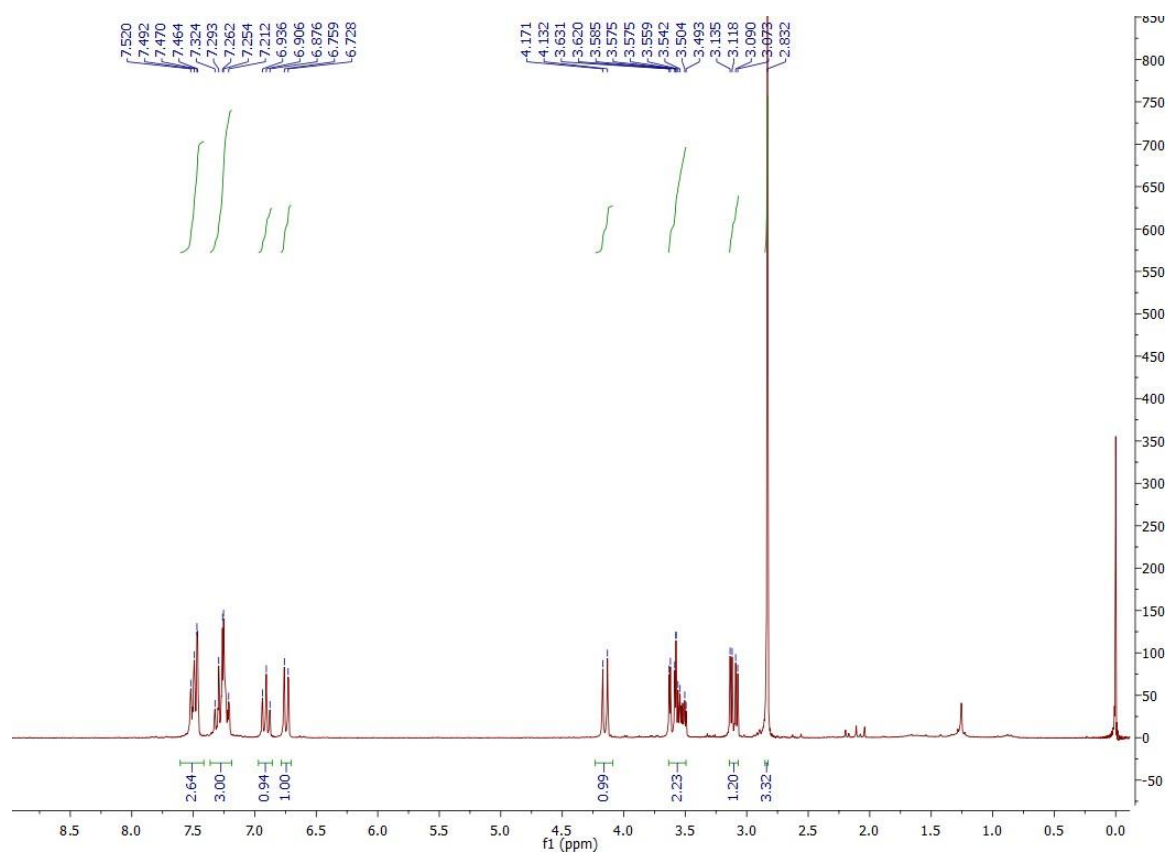

# $^3\text{f}^{13}\text{C NMR}$

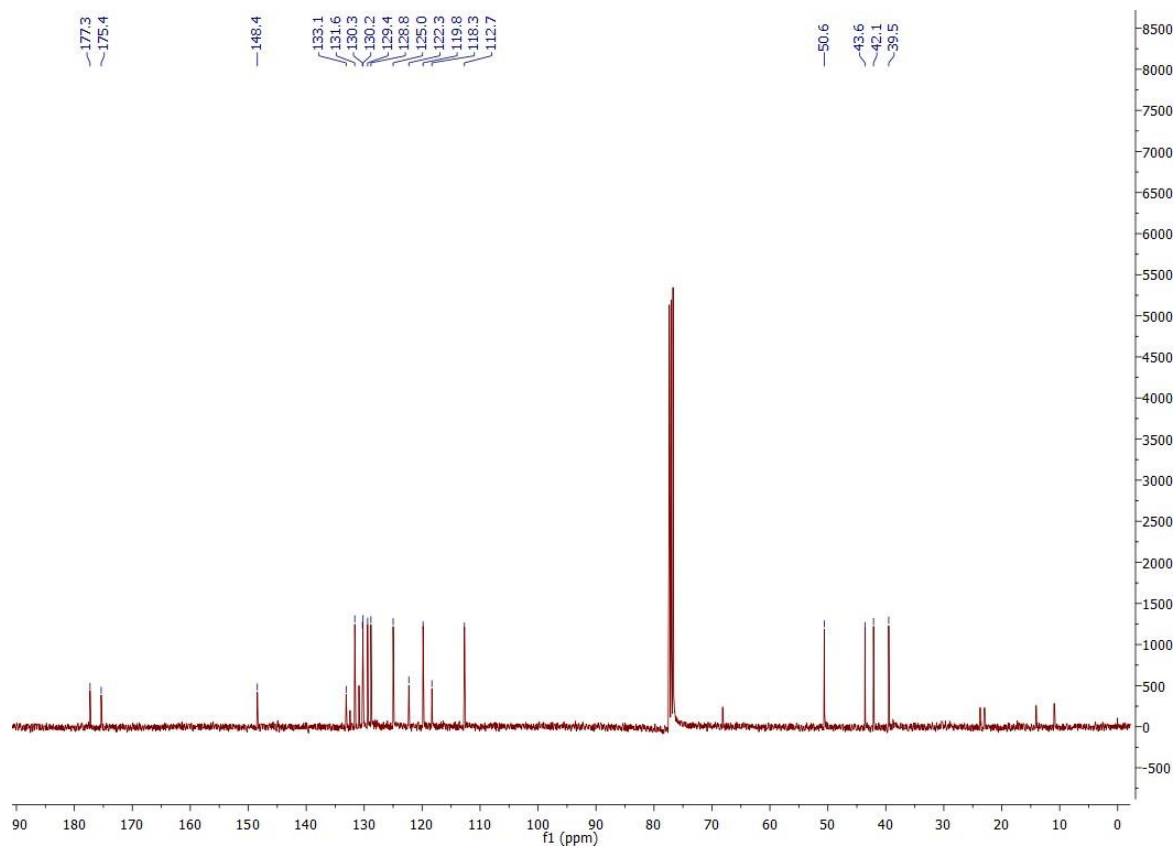



### 3g $^1\text{H}$ NMR

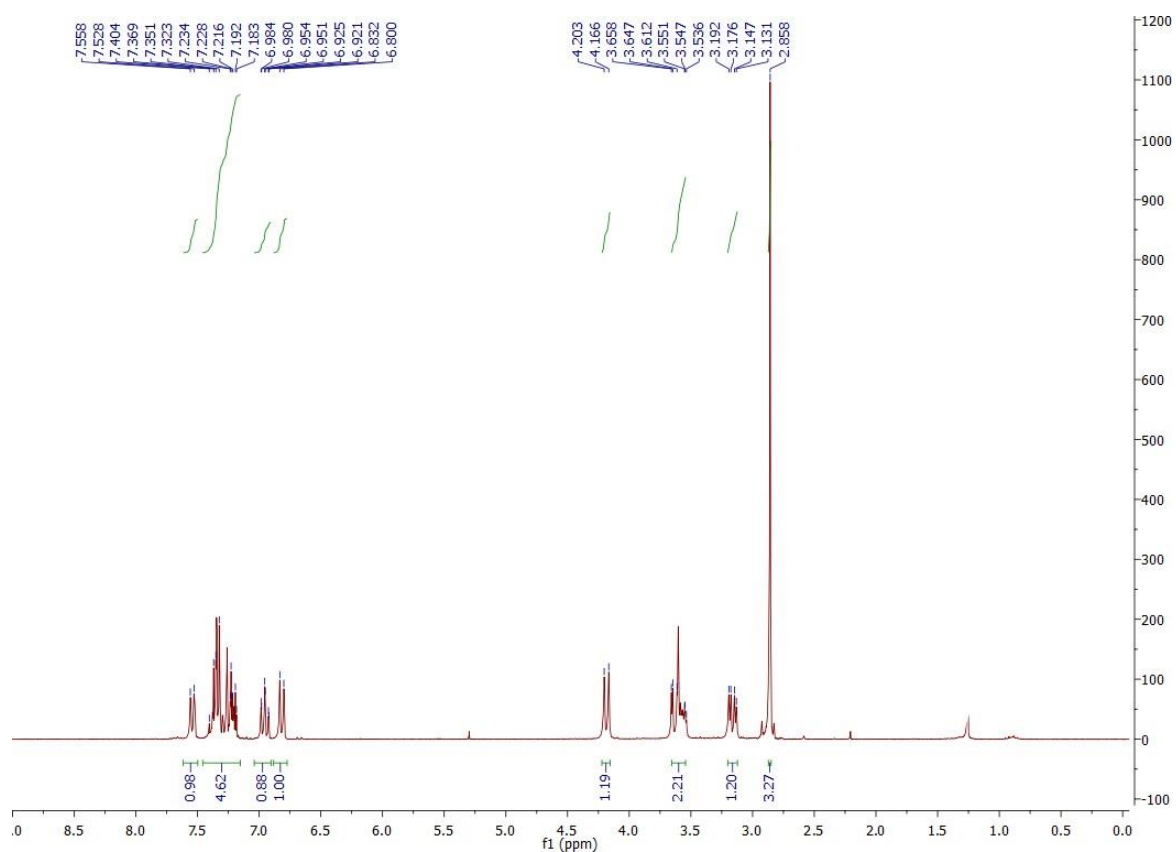

### 3g $^{13}\text{C}$ NMR

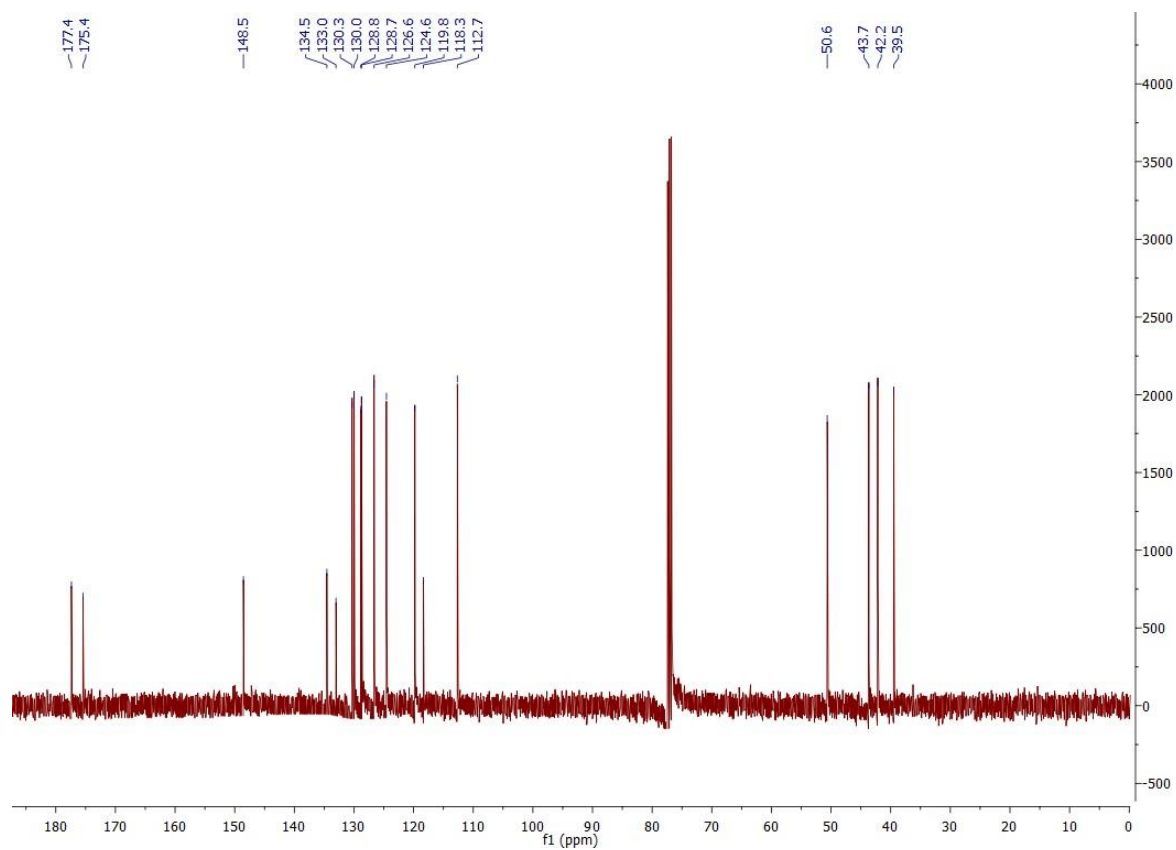

### 3h $^1\text{H}$ NMR

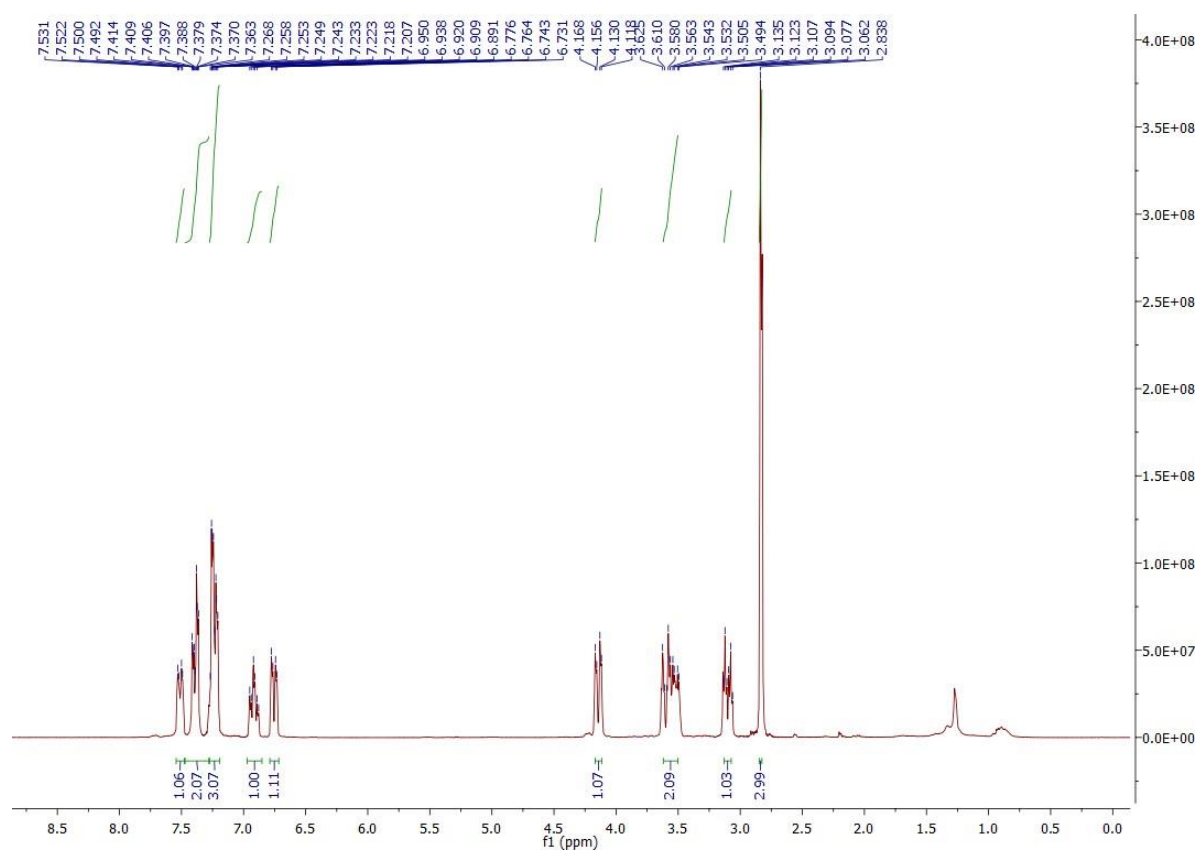

### 3h $^{13}\text{C}$ NMR

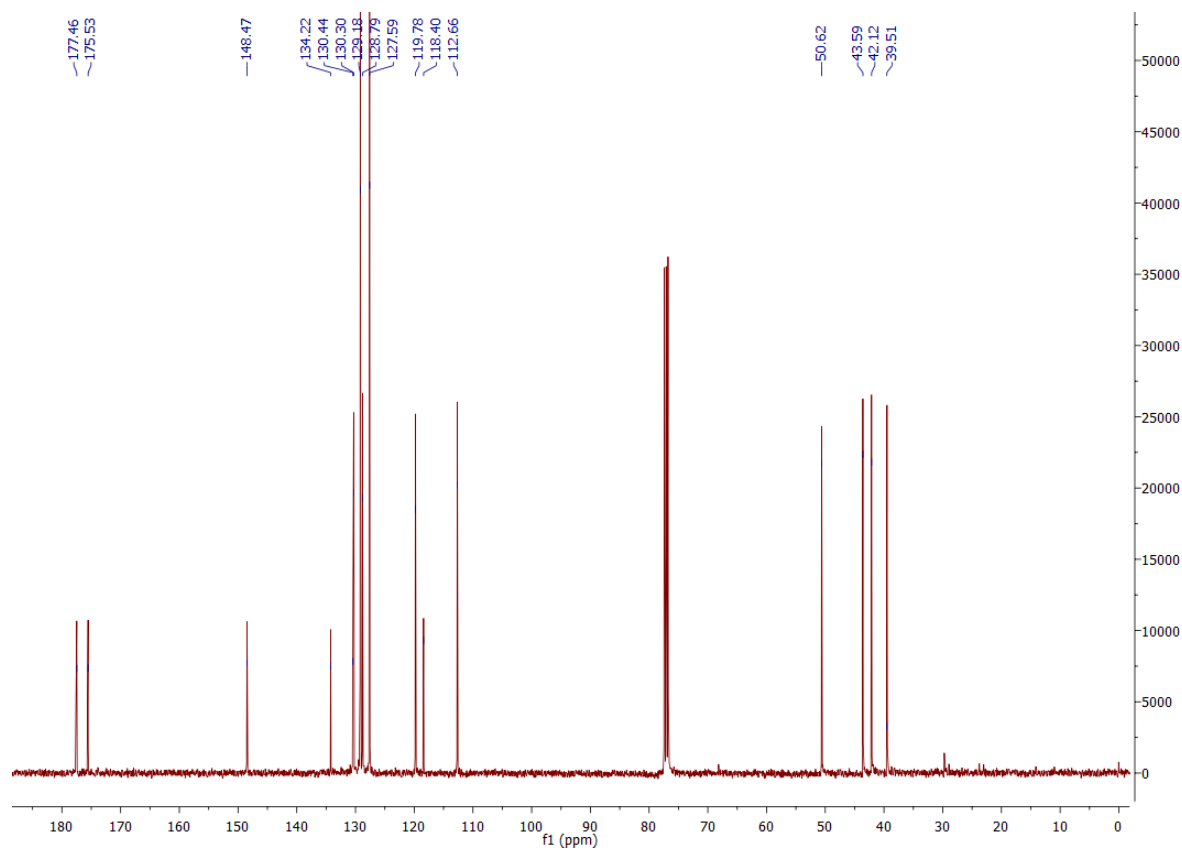

### $^1\text{H}$ NMR

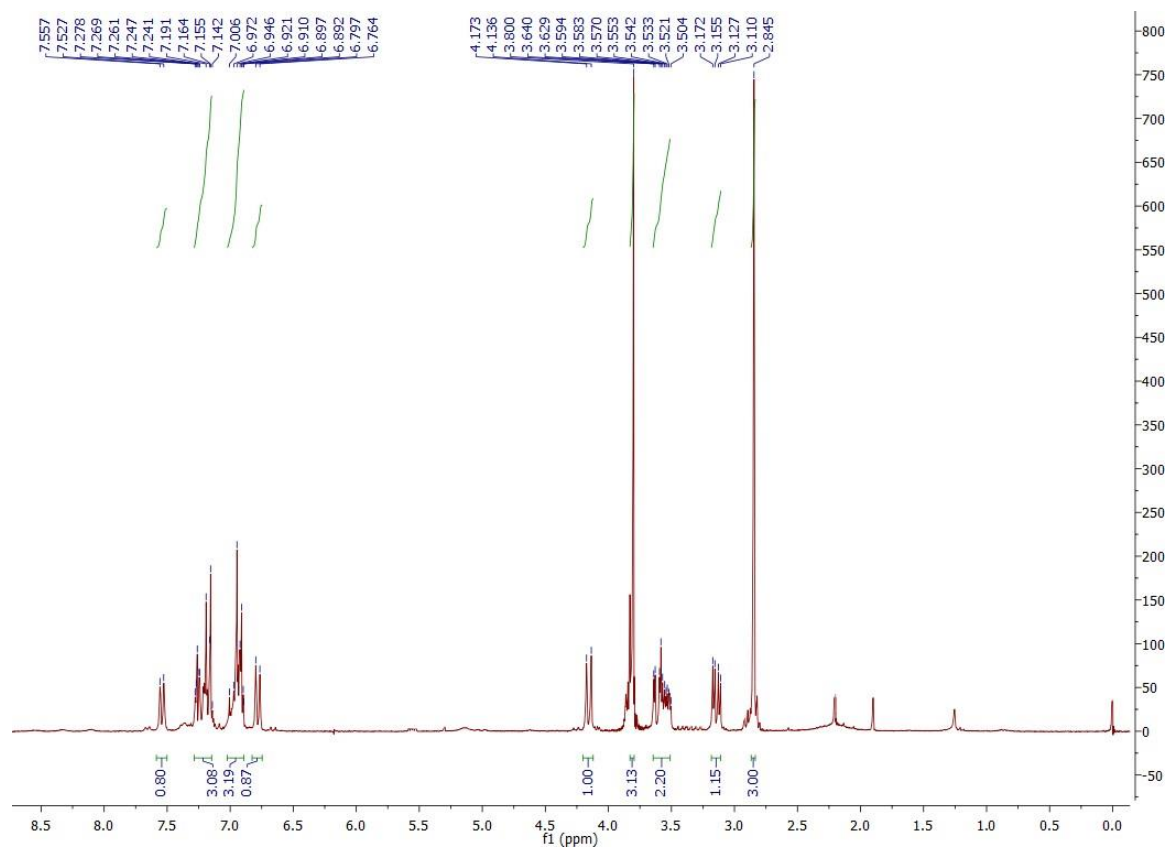

### $^{13}\text{C}$ NMR

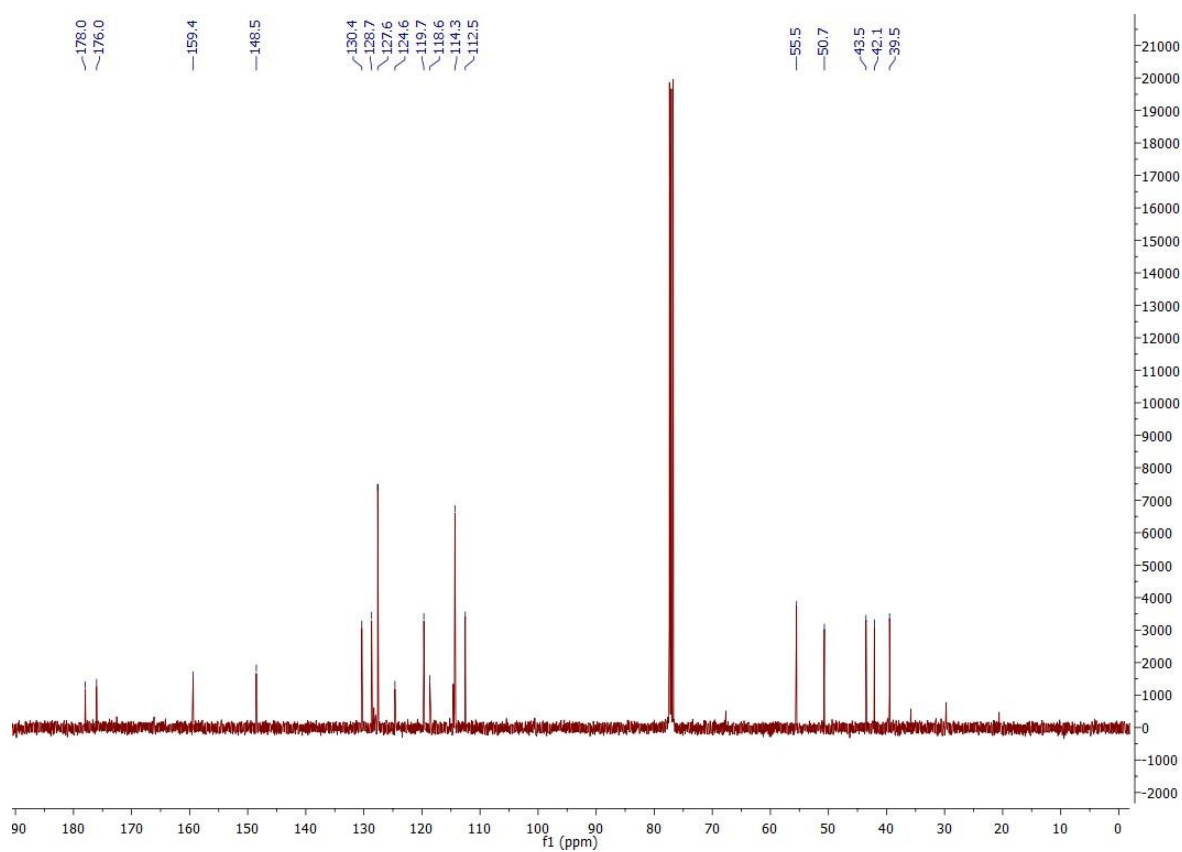

# <sup>3</sup>j <sup>1</sup>H NMR

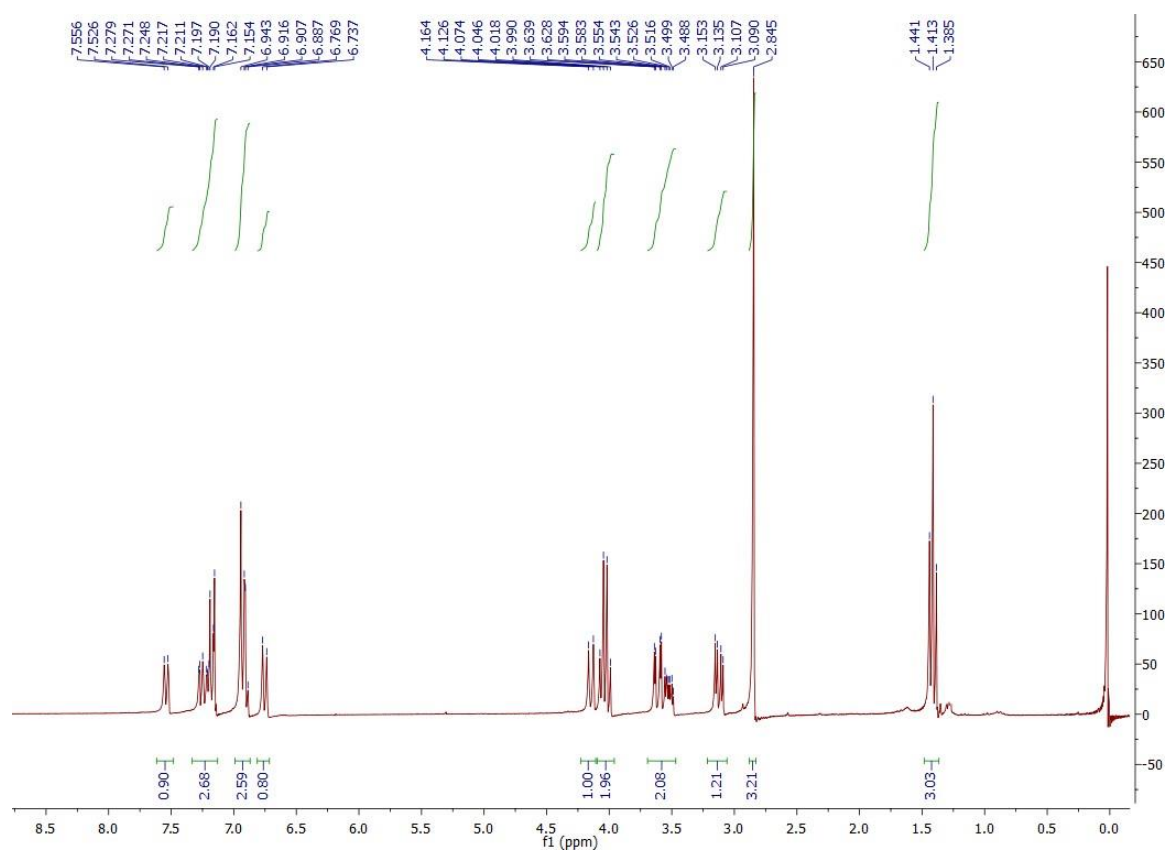

# <sup>3</sup>j <sup>13</sup>C NMR

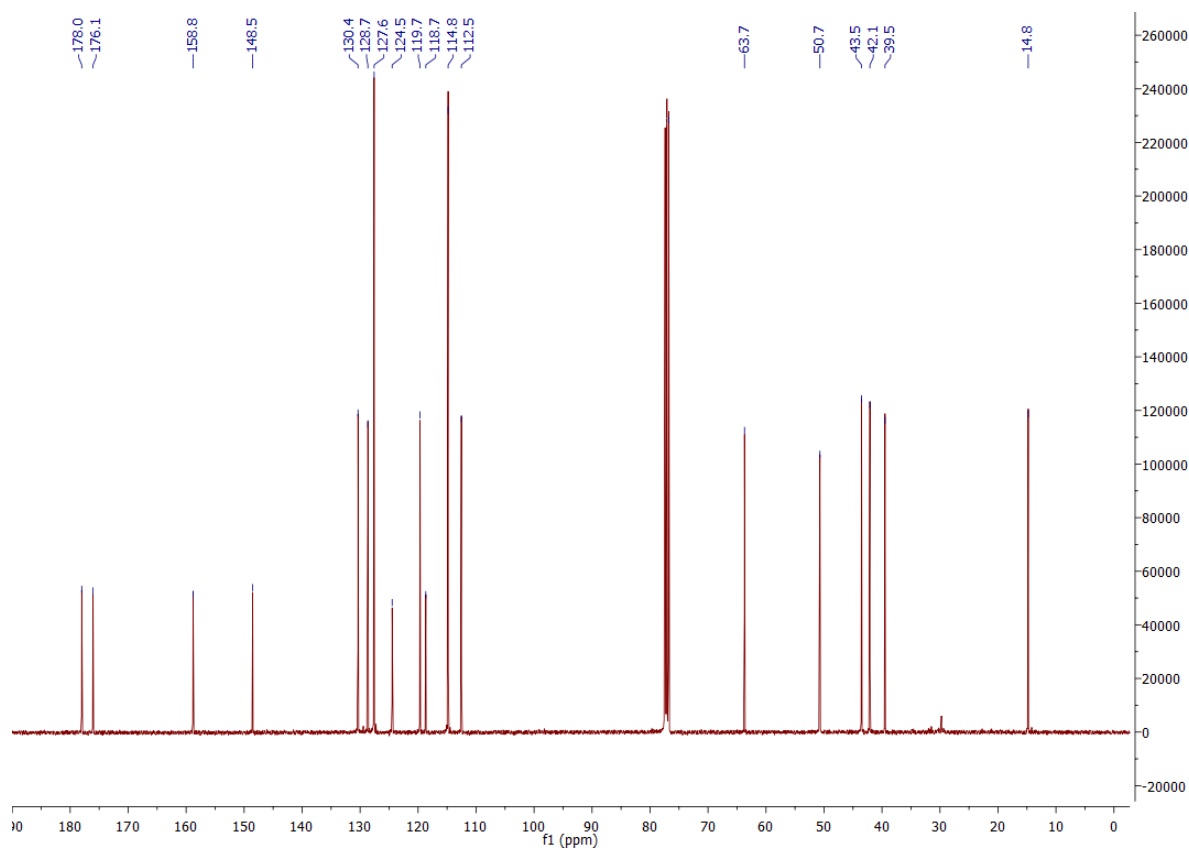

# <sup>3</sup>k <sup>1</sup>H NMR

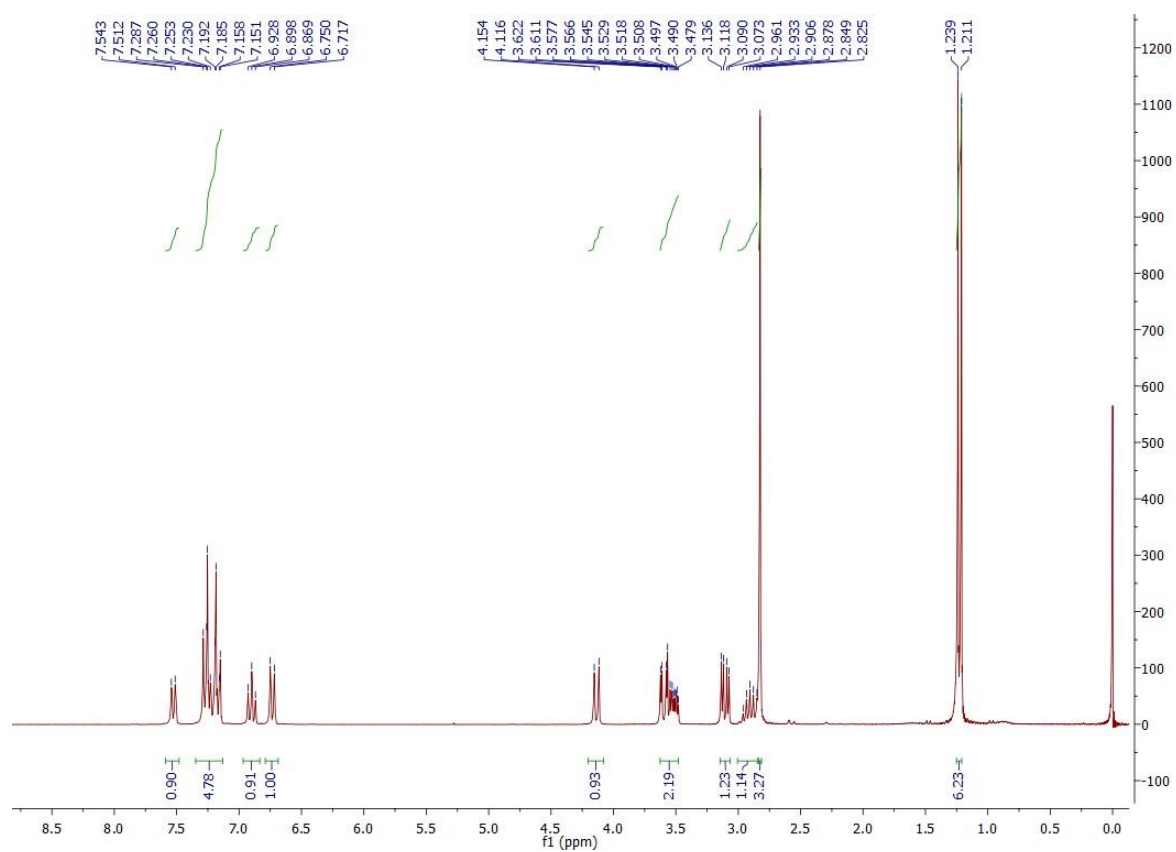

# <sup>3</sup>k <sup>13</sup>C NMR

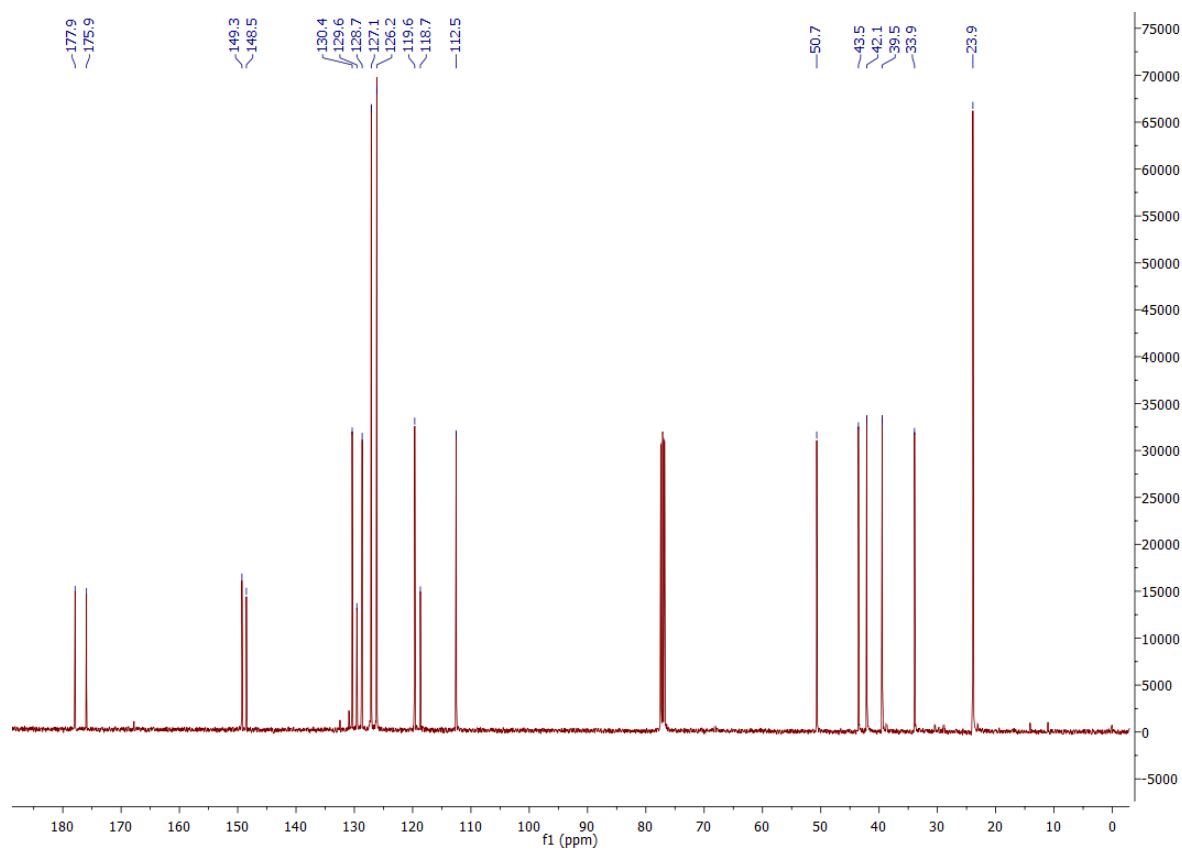

# $^1\text{H}$ NMR

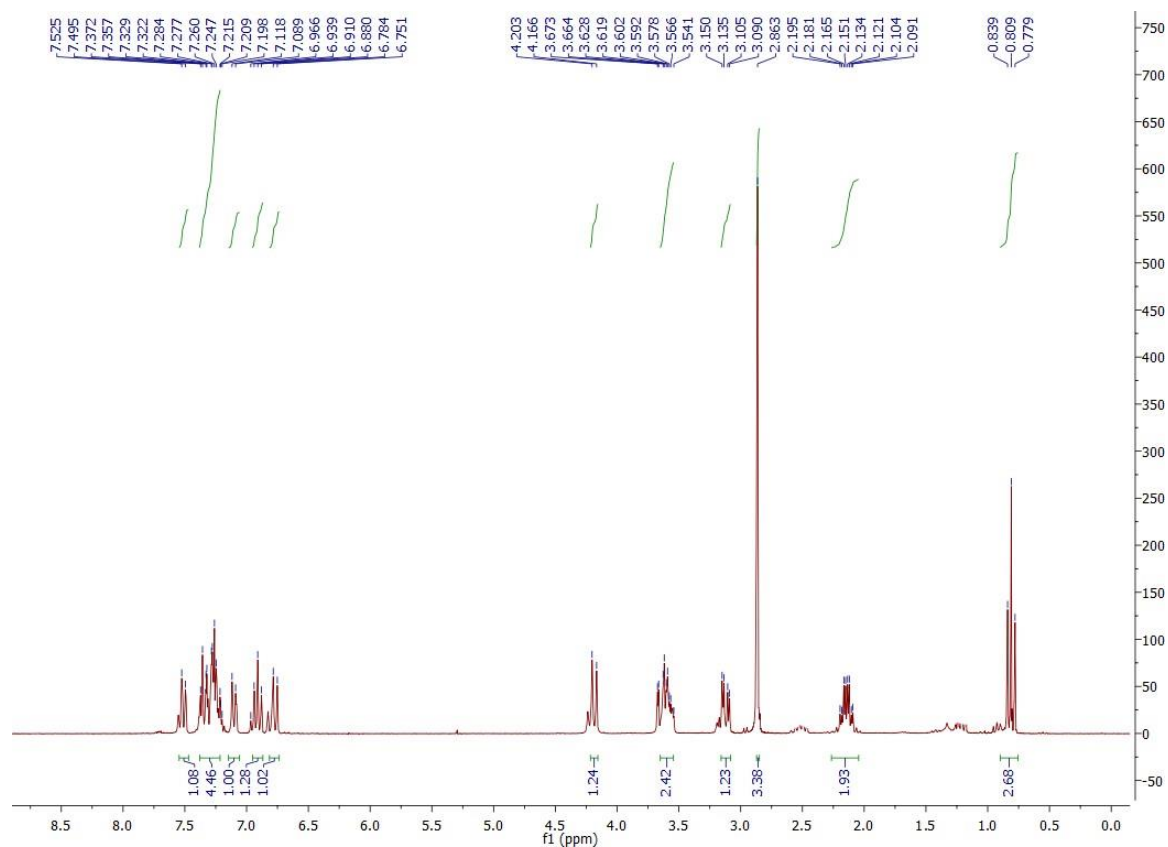

# $^{13}\text{C}$ NMR

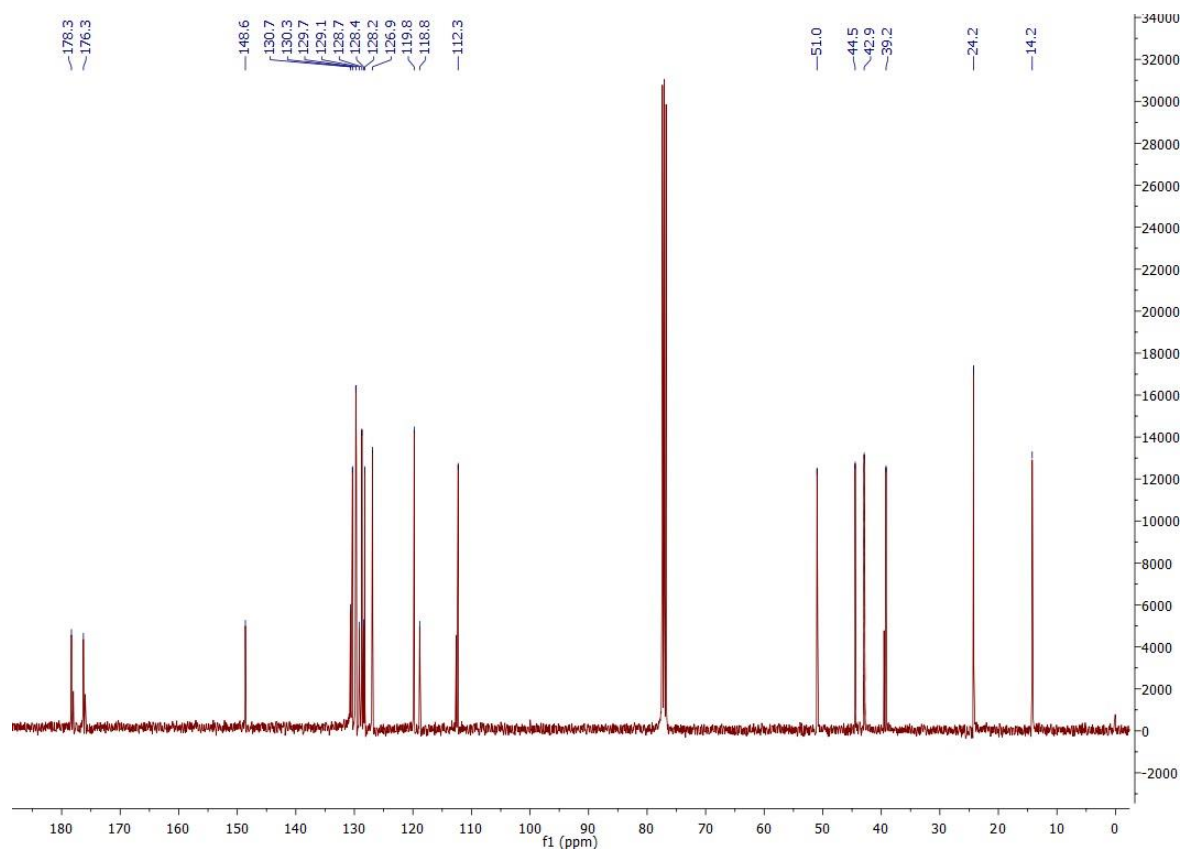

# 3m <sup>1</sup>H NMR

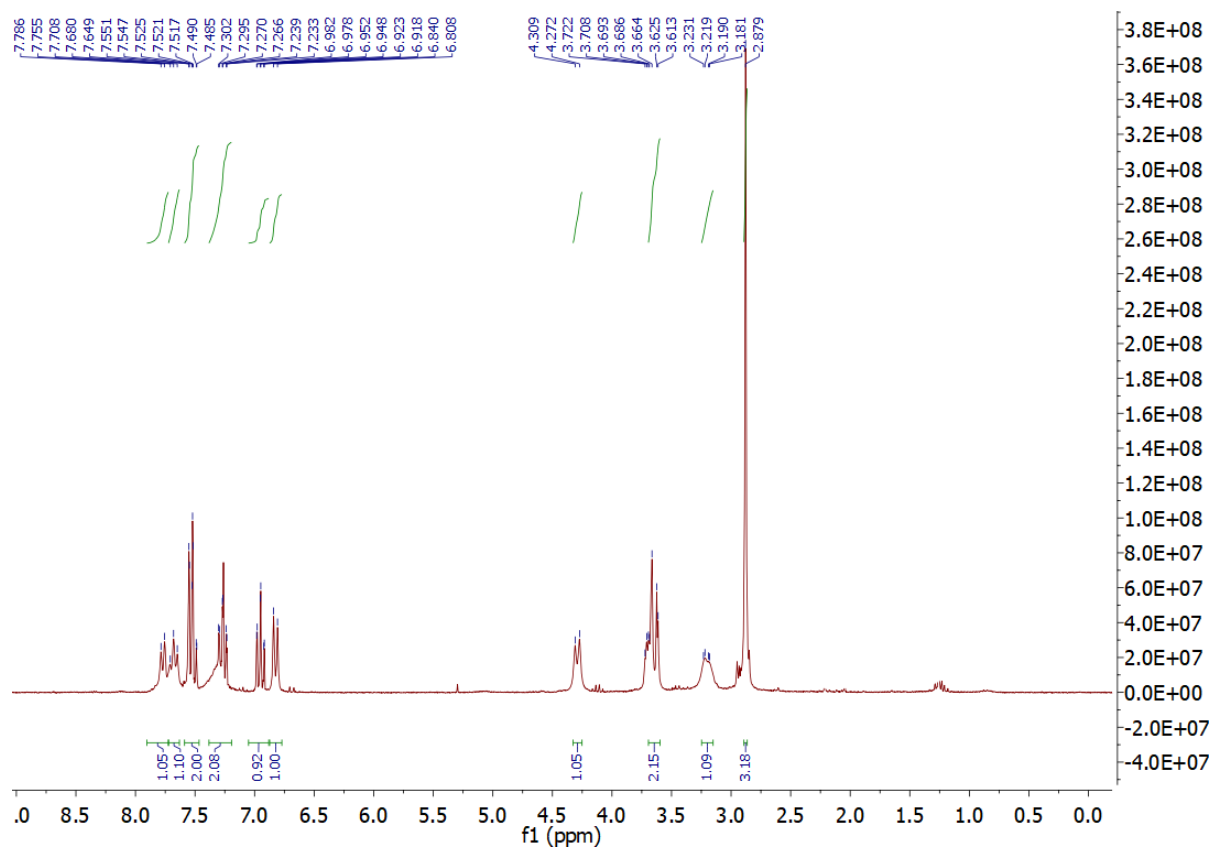

# 3m <sup>13</sup>C NMR

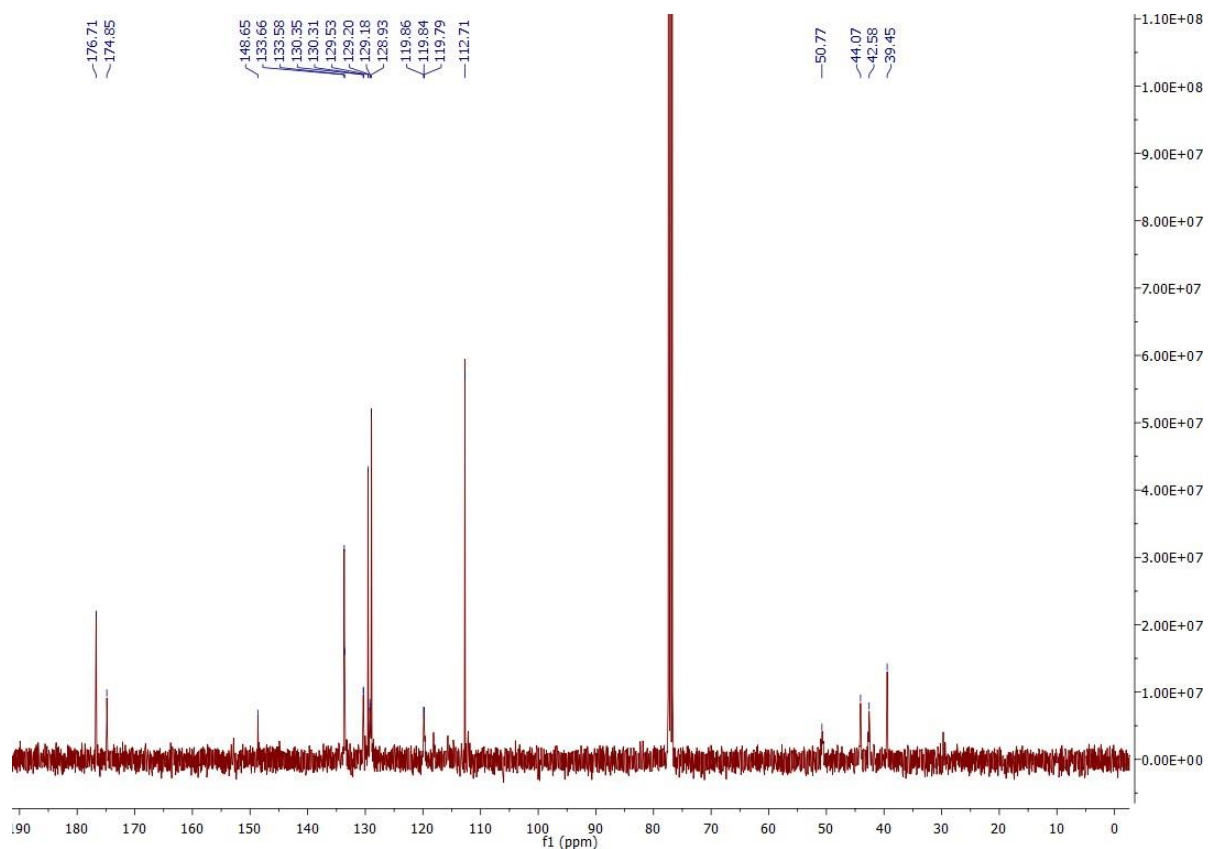

### $3n$ $^1\text{H}$ NMR

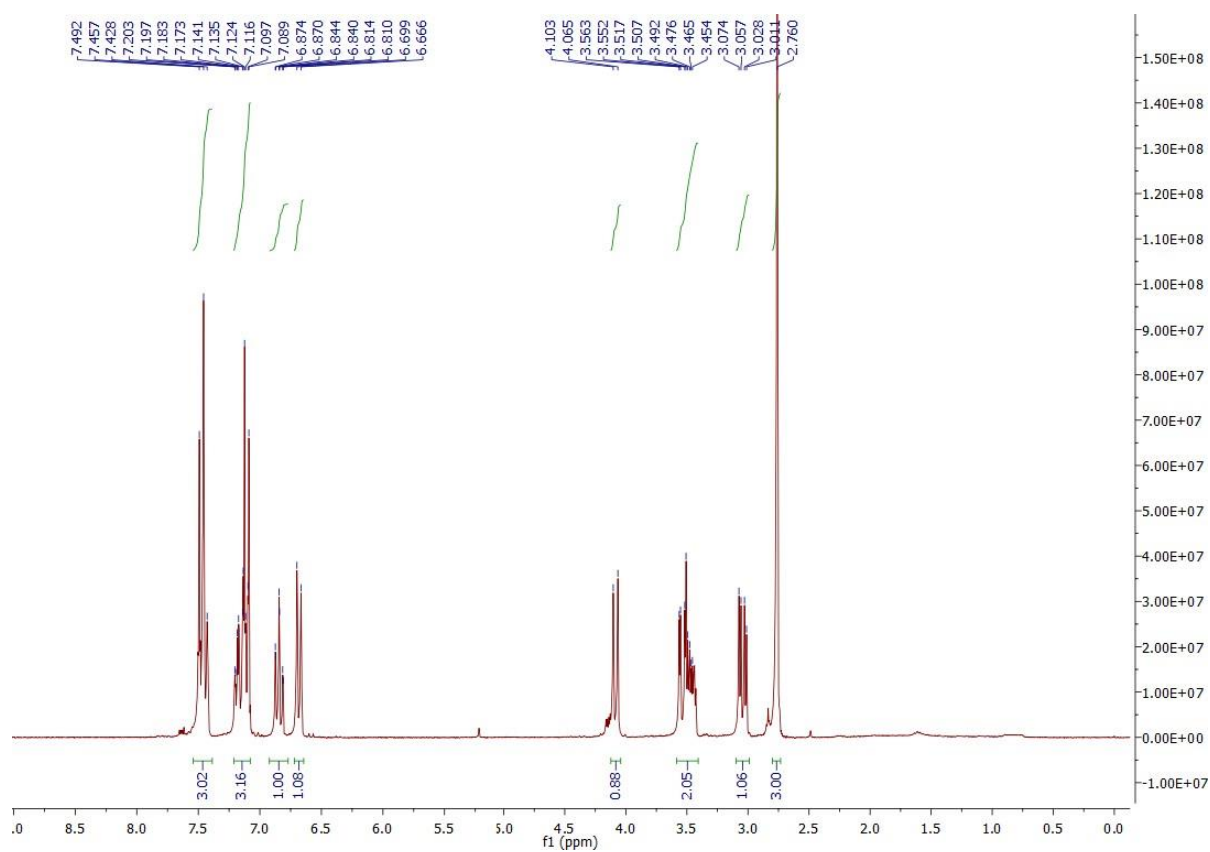

### $3n$ $^{13}\text{C}$ NMR

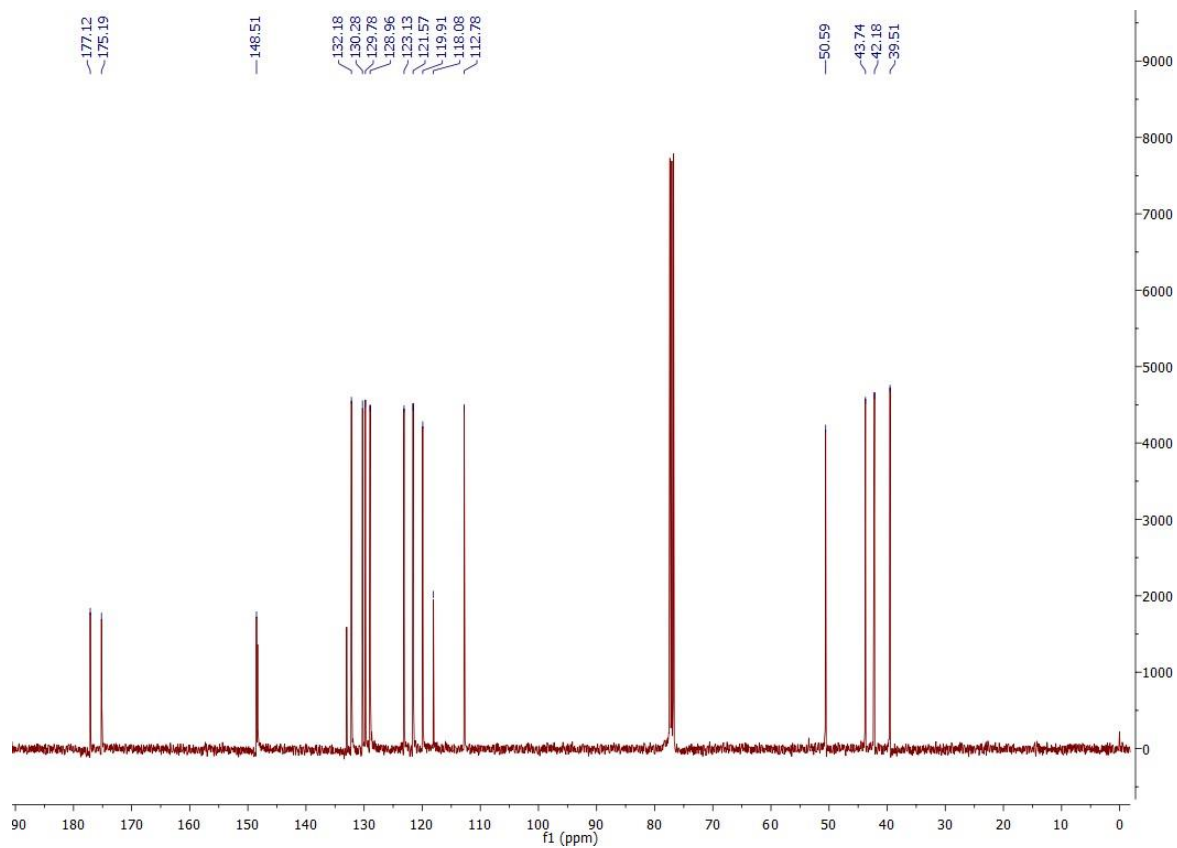



# $^3\text{O } ^1\text{H NMR}$

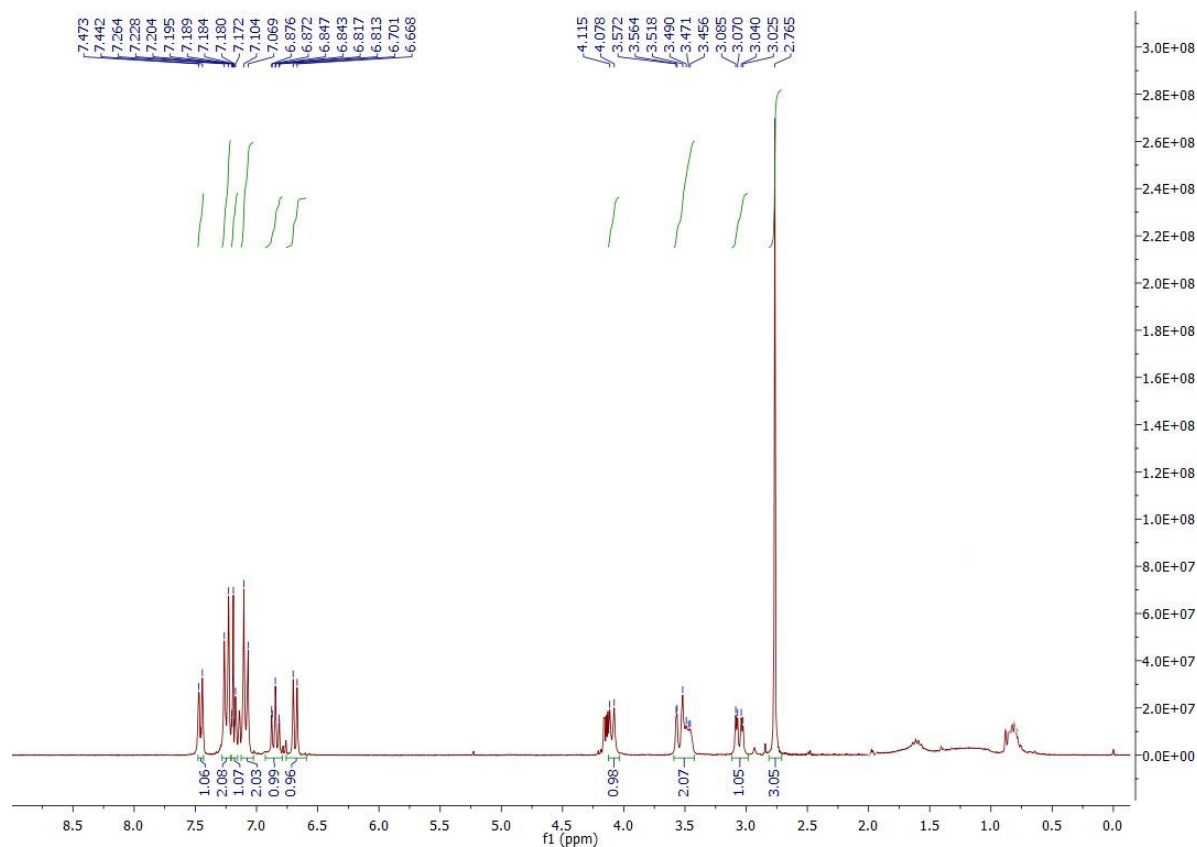

# $^3\text{O } ^{13}\text{C NMR}$

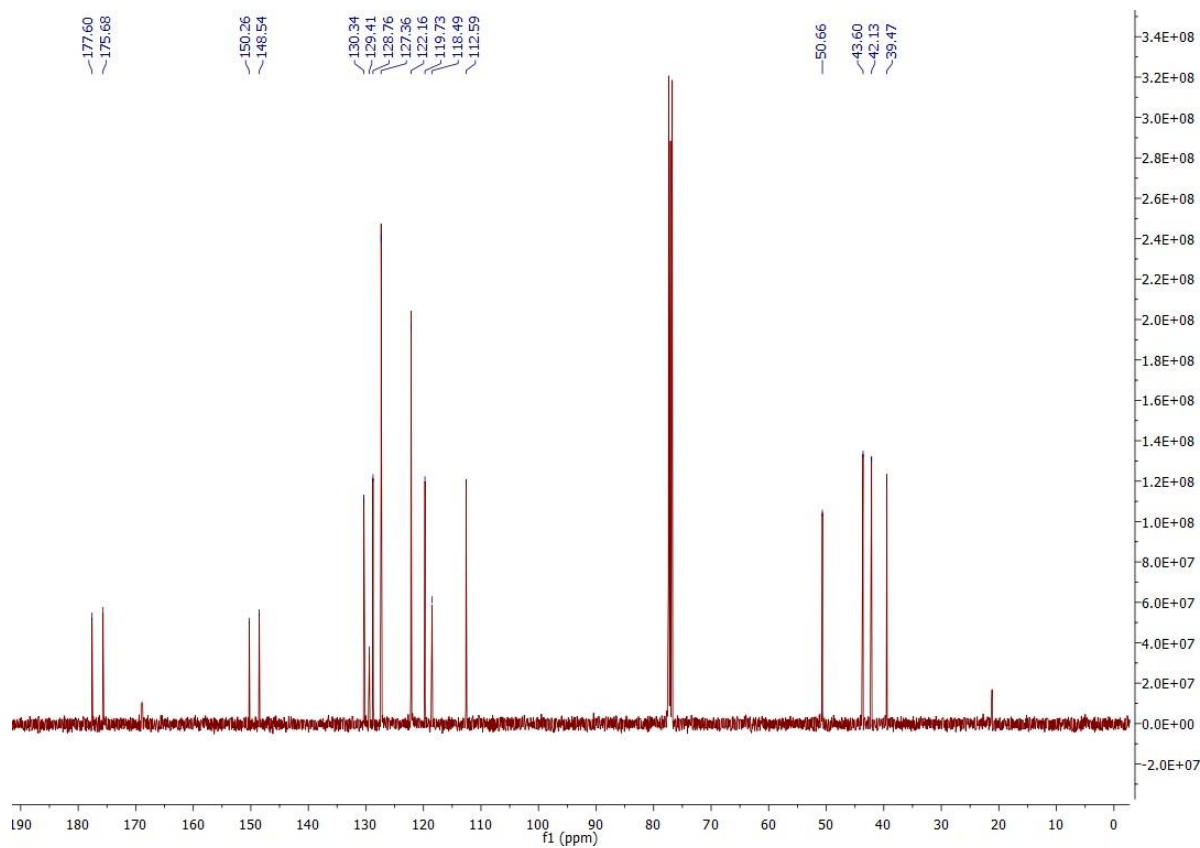

### 3p $^1\text{H}$ NMR

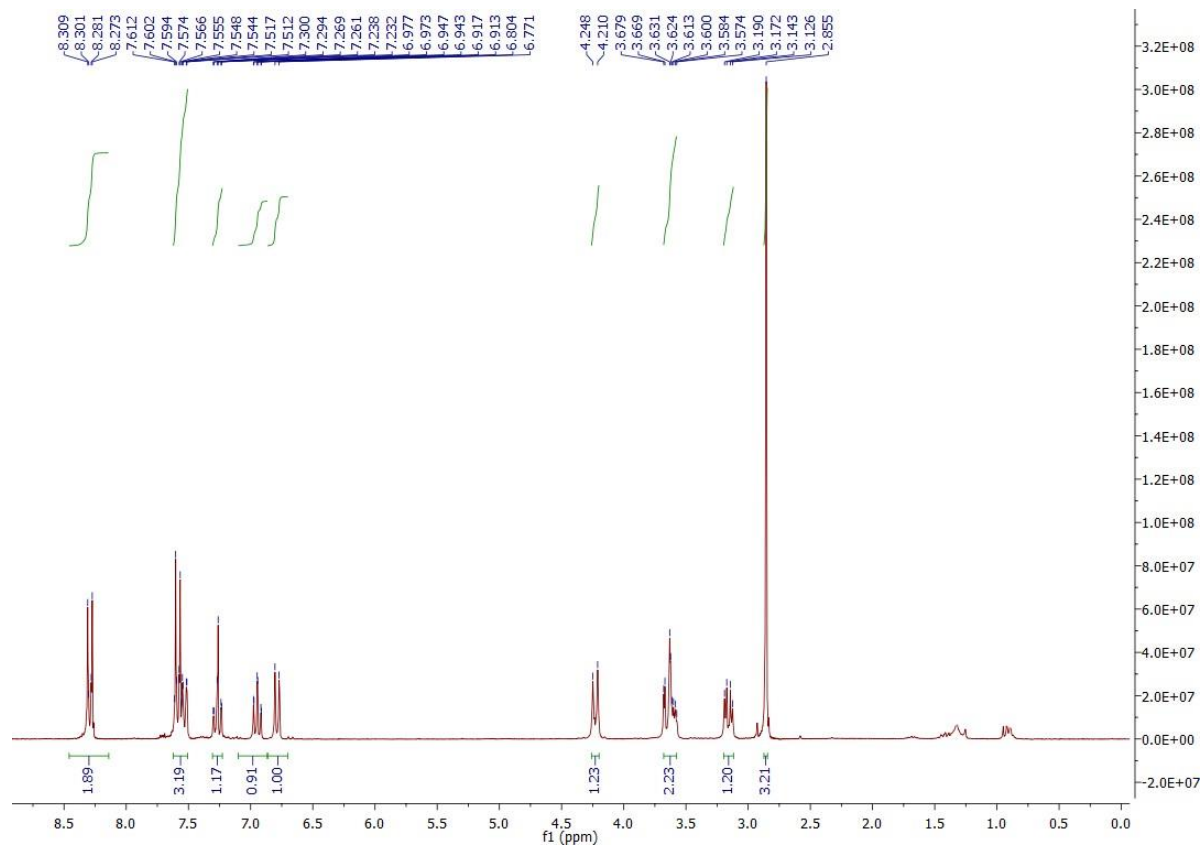

### 3p $^{13}\text{C}$ NMR

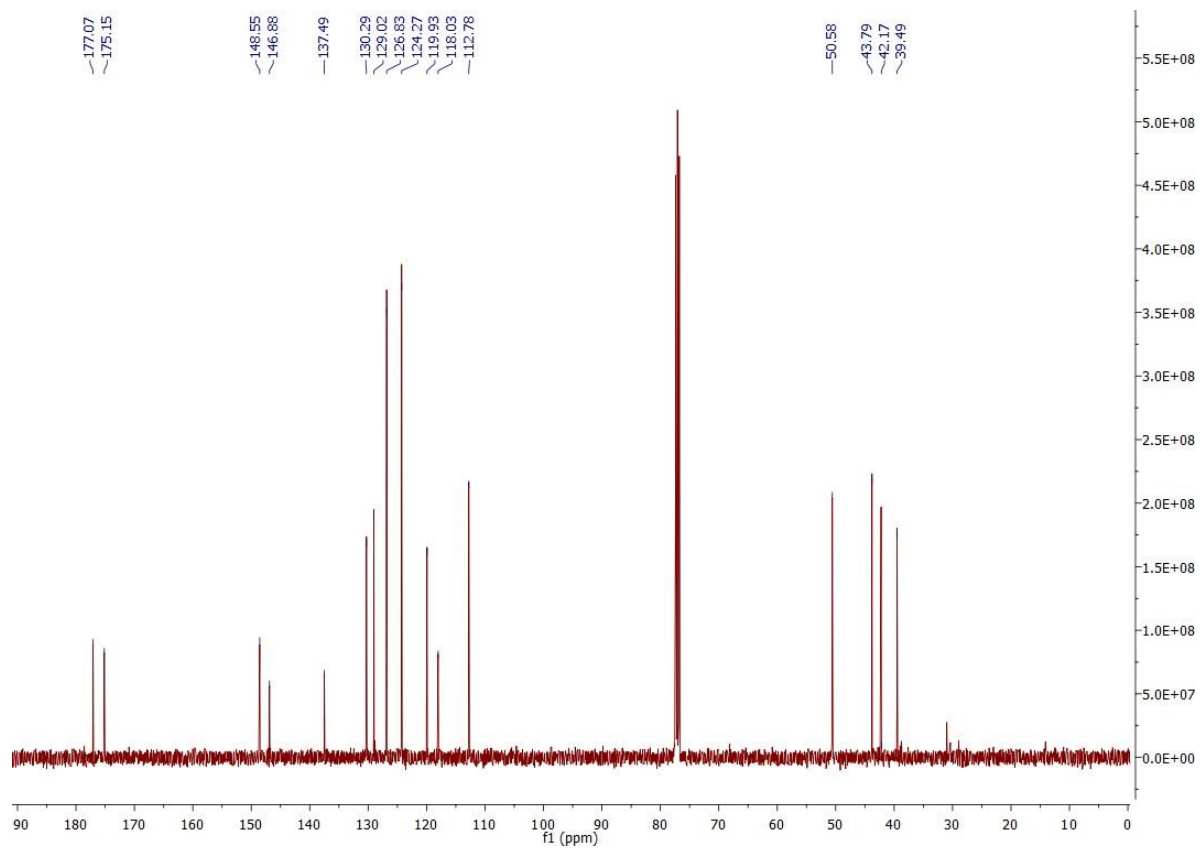

# 3q <sup>1</sup>H NMR

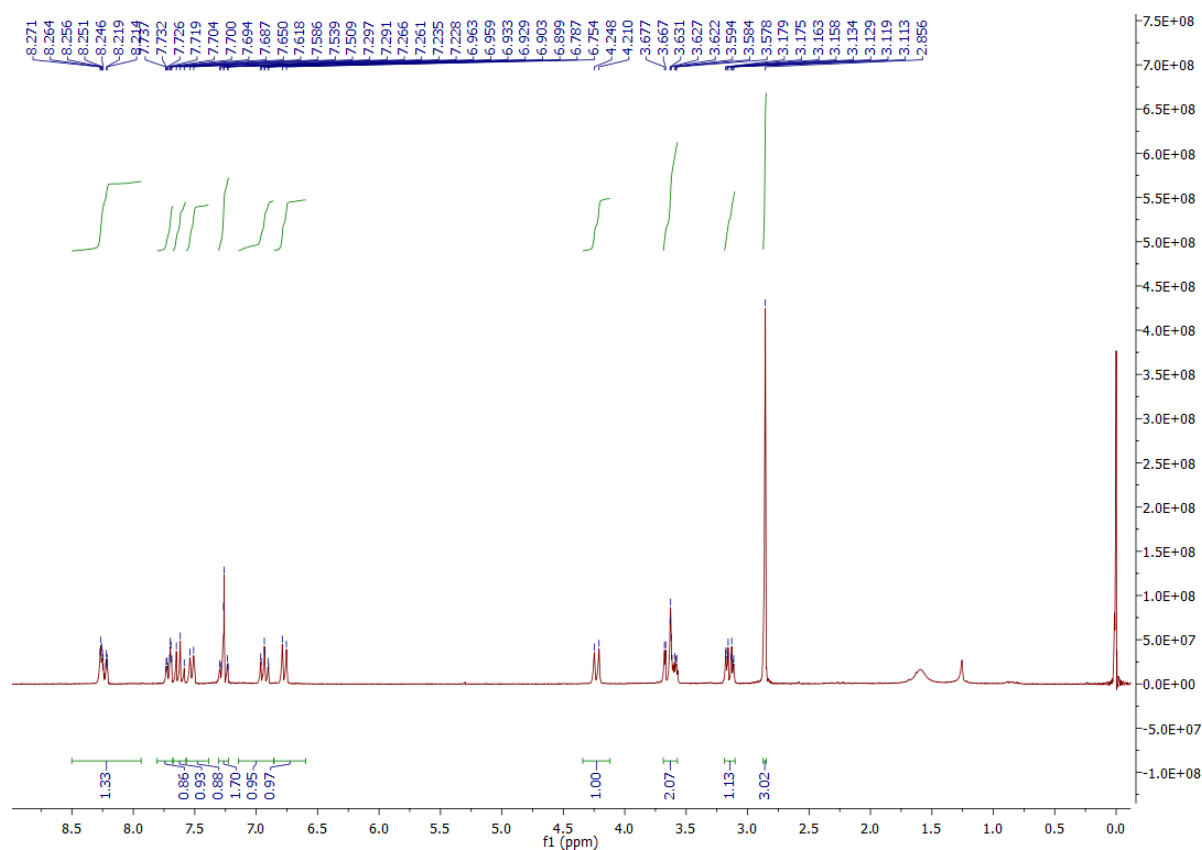

# 3q <sup>13</sup>C NMR

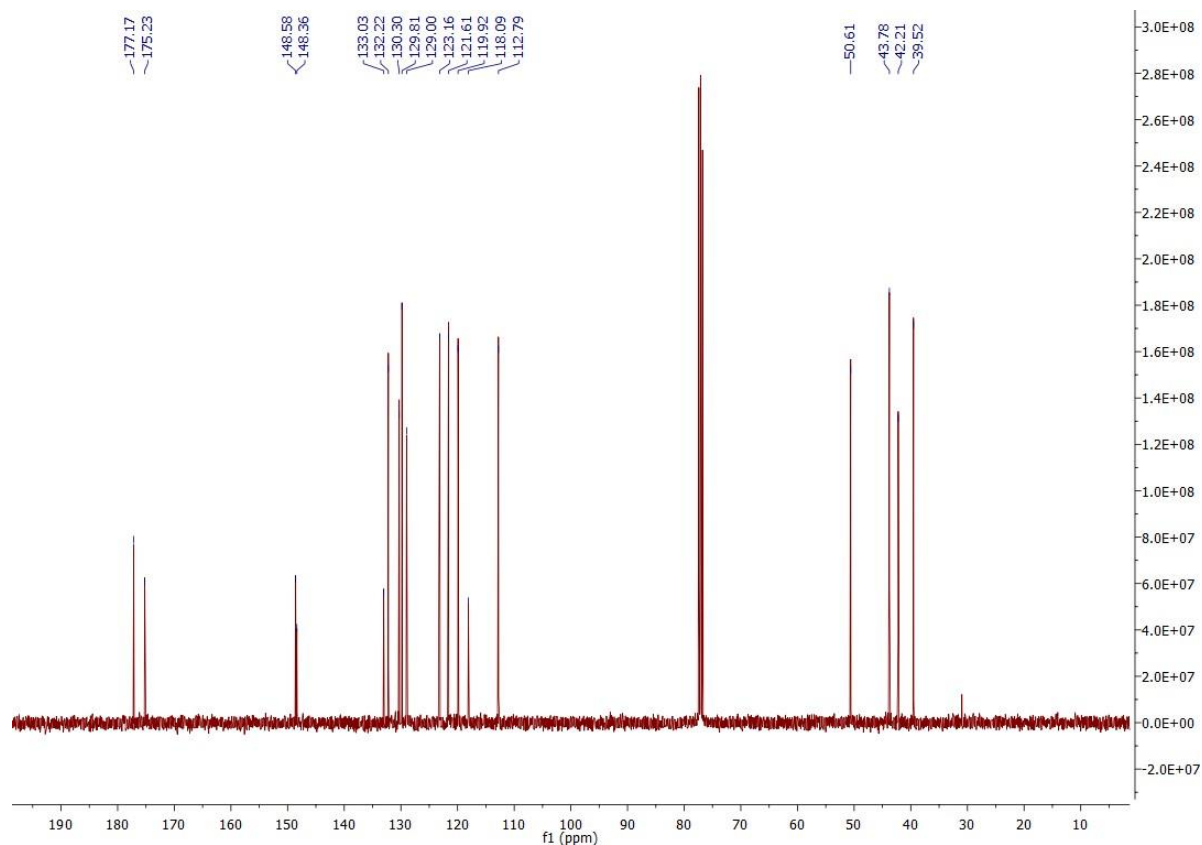

# $3r$ $^1\text{H}$ NMR

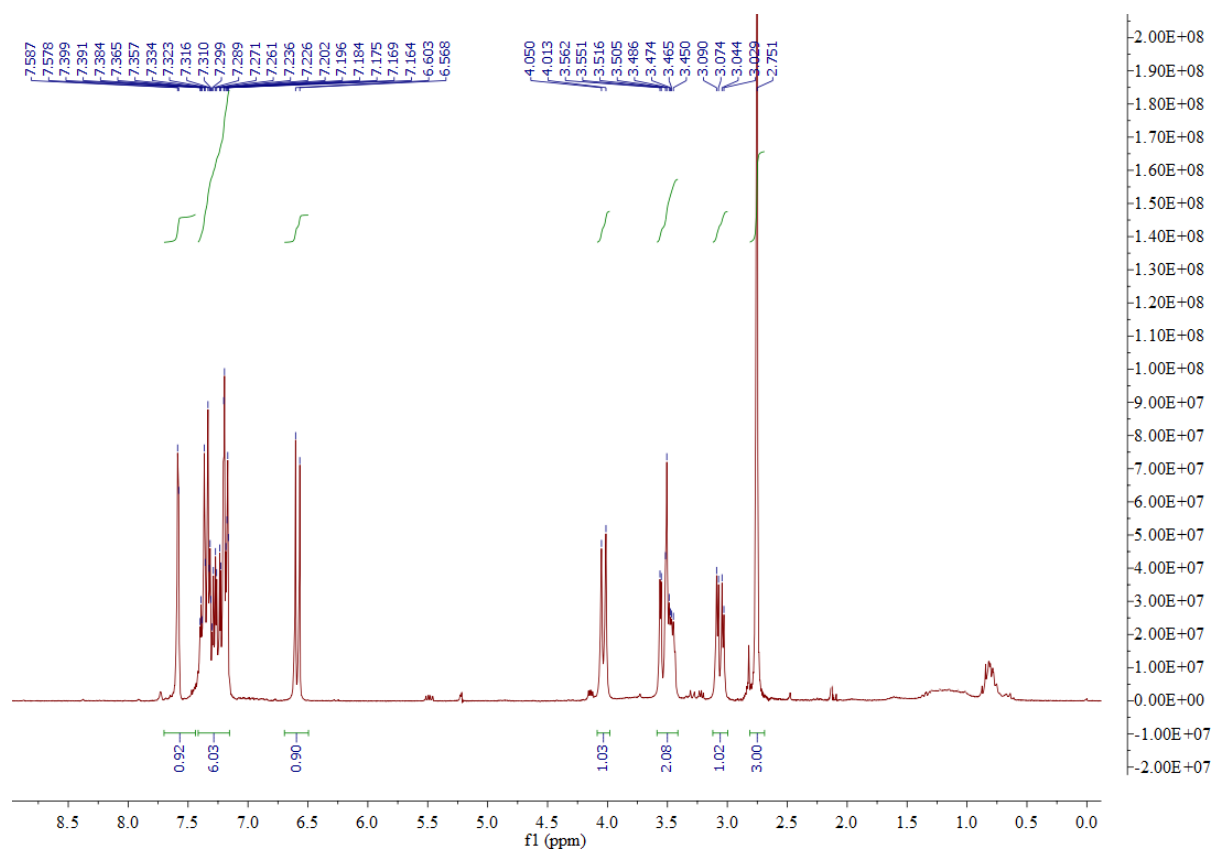

# $3r$ $^{13}\text{C}$ NMR

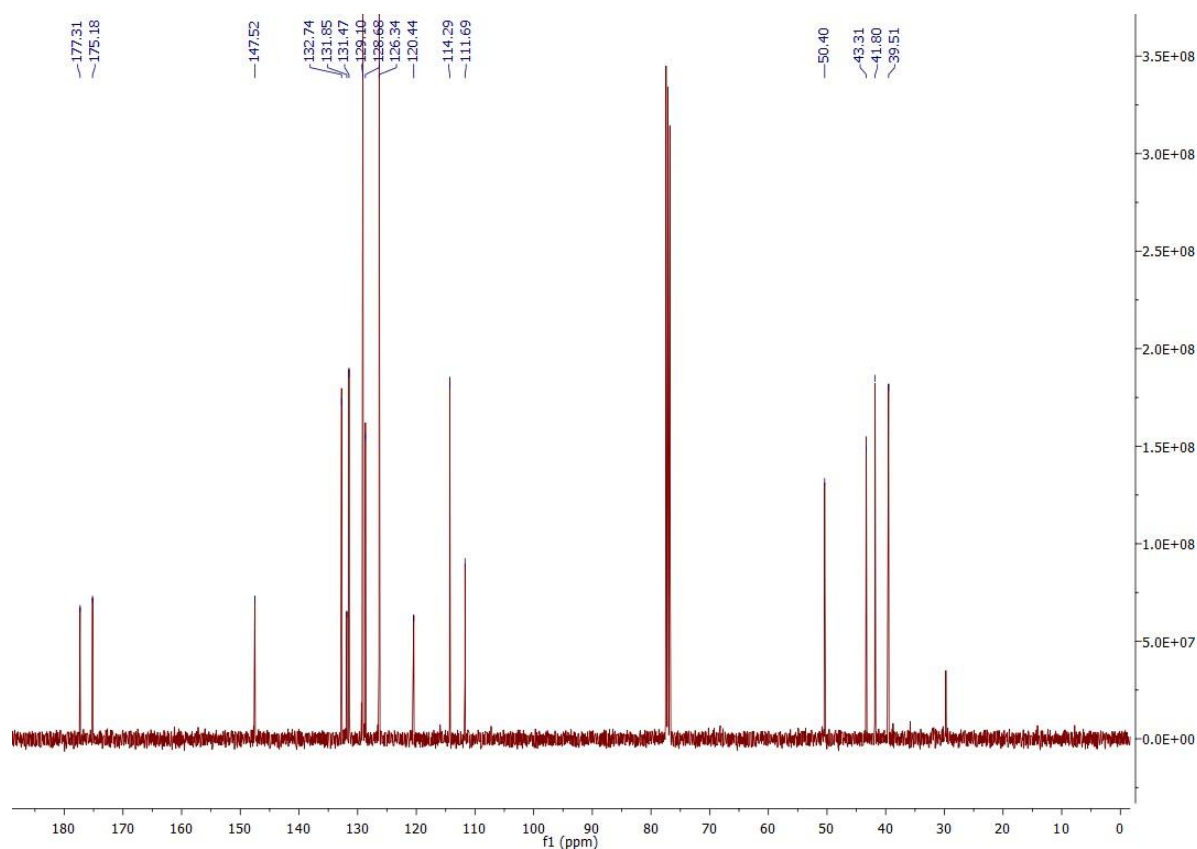

### $3t$ $^1\text{H}$ NMR

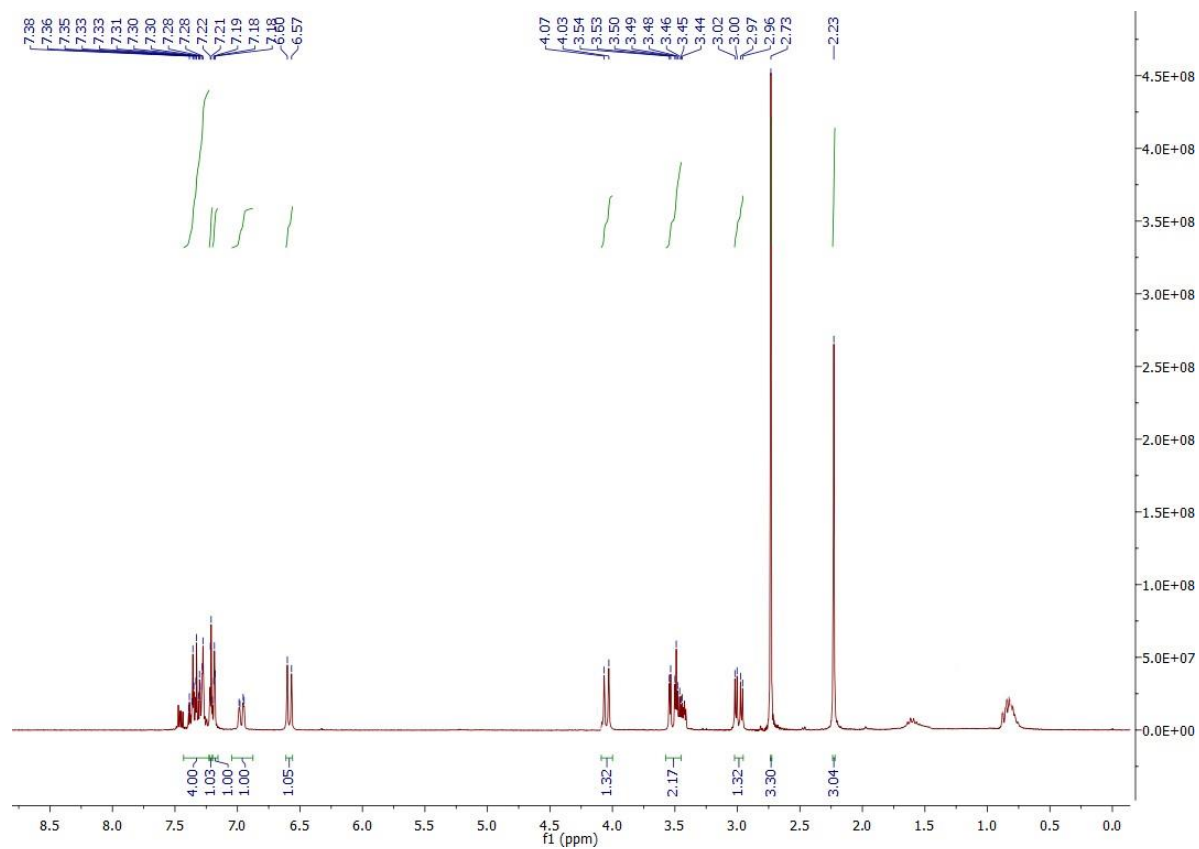

### $3t$ $^{13}\text{C}$ NMR

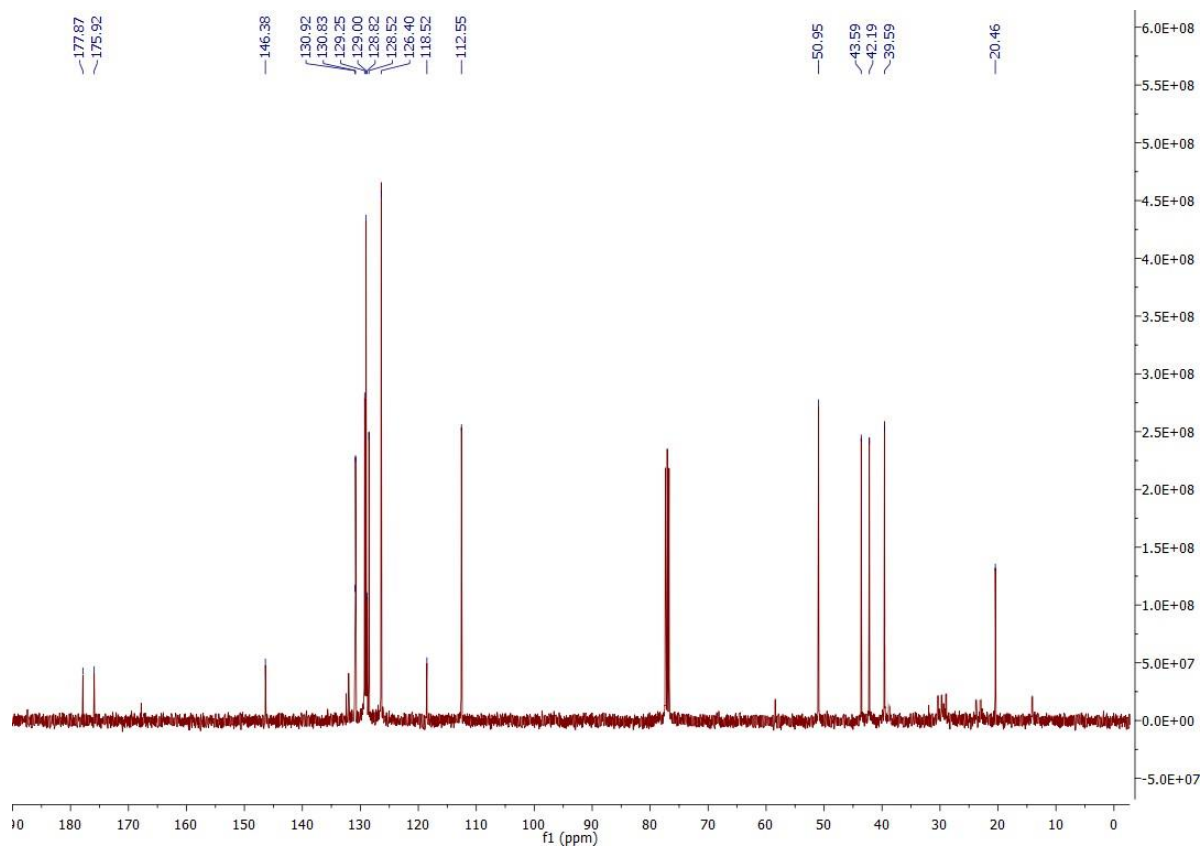

## 8. References

1. N. Matuszak, G. G. Muccioli, G. Labar and D. M. Lambert, *Journal of medicinal chemistry*, 2009, **52**, 7410-7420.
2. M. Sortino, F. Garibotto, V. Cechinel Filho, M. Gupta, R. Enriz and S. Zacchino, *Bioorganic & medicinal chemistry*, 2011, **19**, 2823-2834.
3. S. Kohtani, S. Nishioka, E. Yoshioka and H. Miyabe, *Catalysis Communications*, 2014, **43**, 61-65.
4. J.-T. Guo, D.-C. Yang, Z. Guan and Y.-H. He, *The Journal of Organic Chemistry*, 2017, **82**, 1888-1894.
5. X. Ju, D. Li, W. Li, W. Yu and F. Bian, *Advanced Synthesis & Catalysis*, 2012, **354**, 3561-3567.
6. Z. Liang, S. Xu, W. Tian and R. Zhang, *Beilstein journal of organic chemistry*, 2015, **11**, 425.
7. J. Tang, G. Grampp, Y. Liu, B.-X. Wang, F.-F. Tao, L.-J. Wang, X.-Z. Liang, H.-Q. Xiao and Y.-M. Shen, *The Journal of organic chemistry*, 2015, **80**, 2724-2732.
8. Frisch, M.J.; Trucks, G.W.; Schlegel, H.B.; Scuseria, G.E.; Robb, M.A.; Cheeseman, J.R.; et al. Gaussian 09. Gaussian, Inc., Wallingford, CT, USA, 2009.
